# Supplementary material for: Multi-hazards risks in New York City
Source: Copernicus journal article supplement (doi:10.5194/nhess-2018-193), 2018-07-09
Supplement: Supplementary file [file nhess-2018-193-AC1-supplement.pdf]

1 **Multi-hazards risks in New York City**

2 Yaella Depietri<sup>1</sup>, Khila Dahal<sup>1</sup>, and Timon McPhearson<sup>1, 2, 3</sup>

3

4 <sup>1</sup> Urban Systems Lab, The New School, New York, NY, USA

5 <sup>2</sup> Cary Institute of Ecosystem Studies, Millbrook, New York, USA

6 <sup>3</sup> Stockholm Resilience Centre, Stockholm University, Stockholm, Sweden

7

8 *Correspondence to:* Timon McPhearson ([timon.mcphearson@su.se](mailto:timon.mcphearson@su.se))

9

10

11

12

13

14

15

16

17

18

19

20

21

22

23

24

25  
26  
27  
28  
29  
30  
31  
32  
33  
34  
35  
36  
37  
38  
39  
40  
41  
42  
43  
44  
45  
46  
47  
48  
49  
50  
51  
52  
53  
54  
55

**Abstract**

Megacities are predominantly concentrated along coastlines and making them exposed to a broader mix of natural hazards. The assessment of climatic hazard risk to cities rarely has captures the multiple interactions that occur in complex urban systems. We analyze the risk of New York City as a case study to develop initial methods for multi-hazard risk assessment given the history of exposure to multiple types of natural hazards which overlap spatially and, in some cases, temporally in this coastal megacity. Our aim is to identify hotspots of multi-hazard risk to support the prioritization of adaptation strategies that can address multiple sources of risk to urban residents. We used socio-economic indicators to assess vulnerabilities and risks to three climate related hazards (i.e. heat stress, inland flooding and coastal flooding) at high spatial resolution. The analysis incorporates local experts’ opinions to identify sources of multi-hazard risk and to weight indicators used in the multi-hazard risk assessment. Results show spatial hotspots of multi-hazard risk with similar local residential communities along the coastlines that experience risk to multiple hazards. Analyses suggest that New York City should prioritize adaptation in coastal zones and consider possible synergies and/or tradeoffs to maximize impacts of adaptation and resilience interventions in the spatially overlapping areas at risk of impacts from multiple hazards.

**Keywords**

Adaptation, disaster risk reduction, megacities, multi-hazard risk, social vulnerability, spatial assessment, New York City

56 **1. Introduction**

57 Megacities (i.e. urban areas exceeding 10 M inhabitants) host 500 M people or 6.8 % of the global population,  
58 a proportion that is projected to rise to 8.7% by 2030 (UNDESA, 2016). These urban agglomerations are  
59 highly interconnected and vibrant centers in which enormous physical and intellectual resources are  
60 concentrated. Mainly located along waterways and coastal areas, megacities tend to be more exposed to  
61 disasters and suffer higher social and economic losses (UNDESA, 2016). Earthquakes, cyclones and flooding  
62 are the major threats to megacities (Philippi, 2016). Large cities themselves modify the local and regional  
63 environment, changing the microclimate (e.g. by creating urban heat islands), paving over soil and altering  
64 ecosystem processes, and building up infrastructure (e.g. roads, buildings, pipes, wires), which, together with  
65 projected impacts of climate change such as sea level rise, contributes to magnifying hazard impacts in coastal  
66 inhabited areas (Pelling and Blackburn, 2013). New York City (NYC), a regional megacity, results to be  
67 highly exposed to multiple hydro-meteorological hazards. For example, on the 29<sup>th</sup> of October 2012,  
68 hurricane Sandy made landfall close to Atlantic City, New Jersey (US) with the intensity of a category 3  
69 hurricane. Located approximately 200 km north, the NYC area was severely affected by the hurricane, which  
70 surprised the city largely unprepared to cope with the magnitude of such an event. The city suffered  
71 widespread damage to buildings, power outages, interruptions in utility service and large-scale flooding. In  
72 the Metropolitan region 97 people lost their life, thousands were displaced and economic losses amounted to  
73 more than US\$ 50 billion (Abramson and Redlener, 2012). Hurricane Sandy triggered a series of responses  
74 from the local administration. Since then, the NYC Office for Emergency Management has developed  
75 multiple initiatives to decrease risk to coastal storms, as described in the 2014 NYC Hazard mitigation plan.  
76 Additionally, the city established the Mayor’s Office for Recovery and Resilience in 2014. Innovative design  
77 approaches lead to the recently approved Big U coastal resilience project that is planned as a fortification of  
78 lower Manhattan to protect it from future storm surges and flooding. However, coastal hazards are not the  
79 only extreme events that threaten New Yorkers. According to the U.S. Centre for Disease Control and  
80 Prevention and the US Environment Protection Agency, heat waves kill on average more persons than any  
81 other extreme event in NYC (Depietri and McPhearson, 2018). Then, even precipitation events as low as 38  
82 mm a day are of concern to local authorities because they create surface flooding which impact residents and  
83 infrastructures.

84  
85 Hazards in urban areas often overlap spatially and/or temporally (e.g. rainfalls and storm surges, or heat  
86 waves followed by a storm), though these overlaps are rarely adequately captured by research and policy.  
87 Attention has traditionally been paid to the physical components of risk to hazards, focusing on the potential  
88 joint impacts that multiple hazards could have on the infrastructures and buildings within certain sensitive  
89 areas or locations because of their frequency and intensity (e.g. Kappes et al., 2012b; van Westen et al., 2002).  
90 There has been less study to assess the socio-economic components of multi-hazard risk in cities in order to  
91 design combined plans and policies that can together address multiple sources of vulnerability and risk  
92 (Johnson et al., 2016). Policies based on mono-hazard risk assessments could reduce or even increase  
93 vulnerability and risk to other hazards affecting the same area. A multi-hazard risk assessment, instead

94 facilitates identifying potential synergies or tradeoffs for adaption policies and specific interventions and can  
95 maximize resilience and adaptation by meeting challenges posed by different sources of natural hazard risk.  
96 For example, tree planting or green roof investments to increase stormwater infiltration can also be a  
97 synergistic strategy for the reduction of the urban heat island (UHI).

98

99 The objective of this study is to provide a multi-hazard risk assessment of NYC as a case study of how  
100 megacities in coastal areas are affected by multiple, spatially overlapping hazards. NYC is an important  
101 megacity for examining multi-hazard risk given its global prominence, as being the largest city in the U.S.  
102 with hundreds of US\$ billions in assets and millions of people at risk. It is a coastal city threatened by multiple  
103 hydro-meteorological hazards, further exacerbated by climate change. Here we report data on past and future,  
104 potential multi-hazards events in NYC and assess the combined socio-economic risks of residents to three  
105 different sources of climatic hazards: heat waves, inland flooding and coastal flooding. The analysis is based  
106 on the spatial features of hazards and social vulnerability in the city to inform resilience and adaptation  
107 planning that typically focuses interventions on single hazards. In this way we intend to provide a scientific  
108 basis for future planning in the city as well as recommendations for real world implementation of such a  
109 multi-hazard assessment for other similarly exposed urban areas.

110

#### 111 **1.1. Vulnerability and risk assessment to natural hazards**

112 The study of the impacts of natural hazards on the social-ecological systems has moved from the focus on  
113 the geophysical, climatological or hydro-meteorological phenomena by considering first physical  
114 vulnerability (i.e. exposure and fragility of the exposed elements) and only later the socio-economic,  
115 institutional and cultural factors that increase the exposure, susceptibility and coping capacity of the system  
116 (Bankoff et al., 2004; Birkmann, 2006; Cardona, 2004). In this perspective the occurrence of a hazard does  
117 not necessarily lead to a disaster. Disasters are socio-cultural constructions driven by the features of the  
118 affected social-ecological system, its health and it's management which all contribute in defining risk from  
119 hazards (Oliver-Smith, 2004). In this sense, risk also concerns the values, knowledge and actions of a  
120 particular society (Cardona, 2004; Wisner et al., 2014). Economic factors also play a role in defining  
121 vulnerability and thus risk. For instance, poor populations tend to settle in hazard prone areas where housing  
122 costs are lower, or through past political, economic and cultural legacies that provide them little alternative,  
123 putting them at higher risk (Wisner et al., 2014). The same hazard can cause very different impacts in  
124 adjacent areas which differ for their socio-economic activities and institutional or governance practices. An  
125 example from Collins (2010) describes how in "Paso del Norte" (a city between two countries: El Paso  
126 County, USA and Ciudad Juárez, Mexico) the impacts of floods, that occurred between July and September  
127 2006, were overall of an order of greater magnitude in the Mexican part of the city due to unequal power  
128 relations expressed through the economic system. Risk is thus a complex concept that encompasses both the  
129 features of the hazard and that of the system potentially affected.

130



131 **1.2. Multi-hazard risk assessment**

132 A subgroup of hazard risk-assessments that considers more than one hazard at a time are called multi-hazard  
133 risk assessments. The UNSIDR glossary of term of 2009 defines multi-hazard as “(1) the selection of multiple  
134 major hazards that the country faces, and (2) the specific contexts where hazardous events may occur  
135 simultaneously, cascadingly or cumulatively over time, and taking into account the potential interrelated  
136 effects”. The need for multi-hazard approaches is acknowledged at the local, national and international level.  
137 Already in the early 1990s, the multi-hazard risk approach was proposed as a requirement for the  
138 development of strategies aiming at sustainable urban development. The need for multi-risk assessment is  
139 part of Agenda 21 for sustainable development, formulated during the UN Summit in Rio in 1992, which  
140 requests “complete multi-hazard research” as part of human settlement planning and management in disaster-  
141 prone areas (UNEP, 1992). This was reaffirmed in the Johannesburg Declaration of Sustainable Development  
142 in 2002, which required “[a]n integrated, multi-hazard, inclusive approach to address vulnerability, risk  
143 assessment and disaster management, including prevention, mitigation, preparedness, response and recovery”  
144 (UN, 2002, p. 20). The Hyogo Framework of Action 2005-2015 pledged for the introduction of “integrated,  
145 multi-hazard approach[es] for disaster risk reduction [...] into policies, planning and programming related to  
146 sustainable development, relief, rehabilitation, and recovery activities in post-disaster and post-conflict  
147 situations in disaster-prone countries” (UNISDR, 2005). The Sendai Framework for Disaster Risk Reduction  
148 2015-2030, which follows the Hyogo Framework of Action, calls for disaster risk reduction practices to be  
149 multi-hazard, besides being multi-sectoral and inclusive. And yet, despite decades of attention, we still have  
150 little understanding of risks posed by multiple hazards spatially and temporally interacting in sensitive area  
151 around the world (Wipulanusat et al., 2011).

152  
153 There are different ways to look at how multiple hazards affect a same area, or a group of subjects or objects.  
154 A hazard can lead to another hazard through cascading effects (e.g. a heavy storm causing landslides) (1);  
155 two or more hazards can simultaneously impact a same area (2); or hazards can impact in sequence a same  
156 subject or object leading to cumulative effects (3) (Kappes et al., 2012a). Some studies have assessed certain  
157 aspects of multi-hazard risk in the recent literature. Bernal et al. (2017), adopt a probabilistic approach to  
158 analyze physical risk to earthquakes, landslides, and volcanic eruptions jointly. Similar approach to physical  
159 risk was adopted by van Westen (2002). Liu et al. (2015) propose a multi-hazard risk framework, comparable  
160 to the one we apply in this study, but show an example of multi-hazard risk focusing on physical vulnerability.  
161 Forzieri et al. (2016), look at the multi-hazard assessment in Europe linked to climate change impacts,  
162 considering the hazards features only and leaving for future investigation the vulnerability component. Most  
163 of these case studies thus look at physical vulnerability and risk and consider potentially cascading hazards.  
164 Few studies have looked at the socio-economic component of risk in multi-hazards assessments (Greiving,  
165 2006; Johnson et al., 2016). In this study we explore the socio-economic vulnerability and risk spatially and  
166 by using an extensive survey amongst local experts and stakeholders to identify sources of multi-hazards risk  
167 and to derive weights assessing the importance of different hazards and the vulnerability indicators selected.  
168 We develop a context specific case of multi-hazard risk assessment of NYC, but with a generalizable

169 approach that can be adapted to other regions with variations on the choice of the hazards, vulnerability  
170 indicators and weights assigned to the indicators themselves.

171

### 172 **1.2.1 Multi-hazard risk in large urban areas**

173 Urban areas worldwide tend to suffer greater fatalities and economic losses when compared to their rural  
174 counterparts due to the concentration of people, infrastructures and assets as well as to inadequate  
175 management (Dickson et al., 2012). The high concentration of infrastructures in urban areas (water supply  
176 network, sewage systems, transportation, subways, roads and railways, energy supply network,  
177 telecommunication system, green infrastructures) put them particularly at risk in case of failure or damages  
178 of these critical systems (Graham, 2010). Amongst the natural hazards, heat wave is a predominantly a urban  
179 hazard, meaning that higher degrees of mortality and morbidity are experienced in cities compared to rural  
180 areas (Clarke, 1972; D'Ippoliti et al., 2010). In coastal cities a high number of people are also exposed to  
181 storm surges, water intrusion and erosion (Nicholls and Small, 2002). Coastal ecosystems are the most  
182 productive as well as the most threatened by human activity and expanding urban development in these zones  
183 with increasing concentration of infrastructure and people ultimately further increases risk (MA, 2005;  
184 Pelling and Blackburn, 2013). Urbanization and climate change in coastal areas are on a collision course and  
185 understanding and planning for multi-hazard risk is an increasingly critical part of climate change resilience  
186 and adaptation planning, policy and management.

187

188 Different hazards such as floods, heat waves and earthquakes, when concentrated in densely populated urban  
189 areas, make multi-hazard assessment an important yet challenging task for decision makers. A recent study  
190 analyzed the risk to multiple hazards including landslide, typhoon and heat wave in two districts of Hong  
191 Kong and found that, despite socio-economic differences of the two districts, both present comparable levels  
192 of risk (Johnson et al., 2016). van Westen et al. (2002) looked at physical risk (i.e. of buildings and  
193 infrastructures) in a spatial manner to suggest possible mitigation measures for Turrialba in Costa Rica, a city  
194 exposed to flooding, landslides and earthquakes. Kappes et al. (2012b) assessed geo-physical risk of Faucon  
195 municipality located in the Barcelonnette basin, in Southern French Alps, to debris flows, shallow landslides  
196 and river flooding to support priority settings for users. Likewise, Lozoya et al. (2011) took an ecological  
197 perspective to assess risk of multiple hazards such as riverine floods, storm-induced coastal floods and storm-  
198 induced erosion in S'Abanell urban and touristic beach of Spain, finding that cultural and regulating  
199 ecosystem services were the most affected by hazards in the area. However, few studies have focused on  
200 multi-hazard risk assessment with a strong social component to understand vulnerability in coastal megacities  
201 of the developed world.

202 Multi-hazard mapping, which consists of “the totality of relevant hazards in a defined area” (Kappes et al.,  
203 2012a), is a fundamental approach for multi-hazard risk assessment in urban areas and relevant for the NYC  
204 area. Such an approach allows for the identification of potential hotspots of risk and vulnerability derived  
205 from spatial combination of more than one hazard. In this perspective, the effects of the hazards are  
206 considered as additive, with overlapping degrees of impacts. In this way, impacts acting in the same locations,

207 without interacting causally or coinciding contemporaneously, can be considered jointly. The approach  
208 facilitates the identification of structural improvements that can lead to the combined reduction of the  
209 exposure to two or more hazards in urban areas. The socio-economic determinants of vulnerability, which  
210 often lead to the concentration of vulnerable people in certain area of the city, are examined jointly and help  
211 the identification of zones of the city more likely to suffer harm from multiple hazards and in which more  
212 resources should be invested for adaptation. Multi hazard risk is composed of two main steps: the analysis of  
213 the hazards and of the vulnerability of the system. Thus it widely refers to the vast literature on disaster risk  
214 and vulnerability assessment mentioned above (e.g. Birkmann, 2006; Birkmann et al., 2013; Bogardi and  
215 Birkmann, 2004; Cardona, 2004; Pelling, 2003; Turner et al., 2003; Wisner et al., 2014). The vulnerability  
216 component expresses the predisposition of the system to suffer harm and it generally expressed through the  
217 degree of exposure of the system (or number of subjects or objects potentially affected by the hazard, the  
218 susceptibility (or the fragilities of the system exposed such as the health of the population) and the lack of  
219 resilience (or the incapacity to be prepared, cope and respond to the hazard) (Birkmann et al., 2013). Here,  
220 we analyze how multiple hazard risks overlap spatially in New York City with the goal of supporting planning  
221 and policy for three key objectives: 1) to improve risk reduction through multi-purpose strategies, 2) to  
222 improve adaptive capacity of the city, and 3) to suggest a potential approach for similar multi-hazard risk  
223 assessments in other vulnerability urban areas and settlements.

224

### 225 **1.3. New York City and disaster risk**

226 NYC is the largest city in USA and is located on the East coast (see Figure 1), with approximately 8.2 million  
227 people in just the municipal area with over 10,500 people per km<sup>2</sup> according to U.S. Census Bureau (2010).  
228 The NYC-Newark-New Jersey metropolitan statistical area is much larger, with 20.3 Million people living  
229 in the region closely connected socially, economically, and infrastructurally to NYC<sup>1</sup>. The metropolitan area  
230 is also the largest city in the U.S. in terms of economic activity, this according the U.S. Census Bureau.  
231 Approximately 1.4 million people aged 60 and older live in the city, representing a particularly vulnerable  
232 group, especially for heat-related morbidity and mortality. Elderly constitute 17% of the population at  
233 present, and this proportion is expected to grow considerably in coming years (Goldman et al., 2014). NYC  
234 is also built around a network of rivers, estuaries and islands with much of the Metropolitan region situated  
235 less than 5 m above mean sea level (Colle et al., 2008) which contributes to the hazard context especially in  
236 terms of coastal flooding.

237

238 We focus our analysis on three hazards that cause the highest human impacts in NYC (see Depietri and  
239 McPhearson, 2018): heat waves, inland flooding and coastal flooding. Heat waves in NYC are defined by  
240 the NYC Panel on Climate Change (NPCC) 2015 Report as three consecutive days above 90F (or about 32.2  
241 °C) (Horton et al., 2015a). Inland flooding in NYC can be triggered by precipitation of more than 1.5 inches

---

<sup>1</sup> <https://factfinder.census.gov/faces/tableservices/jsf/pages/productview.xhtml?src=bkmk> (retrieved on March 25<sup>th</sup> 2018)

242 (or 38 mm) of rain per day since the city’s drainage system is designed to handle heavy rainfall with  
243 intensities of 1.5 inches (about 38 mm) per day in most areas of the city where sewers were built prior to  
244 1960, and of 1.75 inches (about 44 mm) per day in locations with sewers were built after 1960 (Llyod and  
245 Licata, n.d.). Coastal flooding is primarily driven by storm surge. NYC is affected by changing climate with  
246 future projections including probable higher temperatures, increasingly frequent heavy downpours, and a  
247 rising sea level that will further increase storm surge and coastal flooding (Garner et al., 2017; Horton et al.,  
248 2015a; Lin et al., 2012, 2016; Reed et al., 2015; Rosenzweig and Solecki, 2015). In the next sections, we  
249 describe each hazard and its local impacts. Information about multi-hazard risk in the city is scarce in the  
250 available literature, consequently we have combined multiple sources of evidence of the occurrence of multi-  
251 hazards events in NYC and review them in section 3.1.

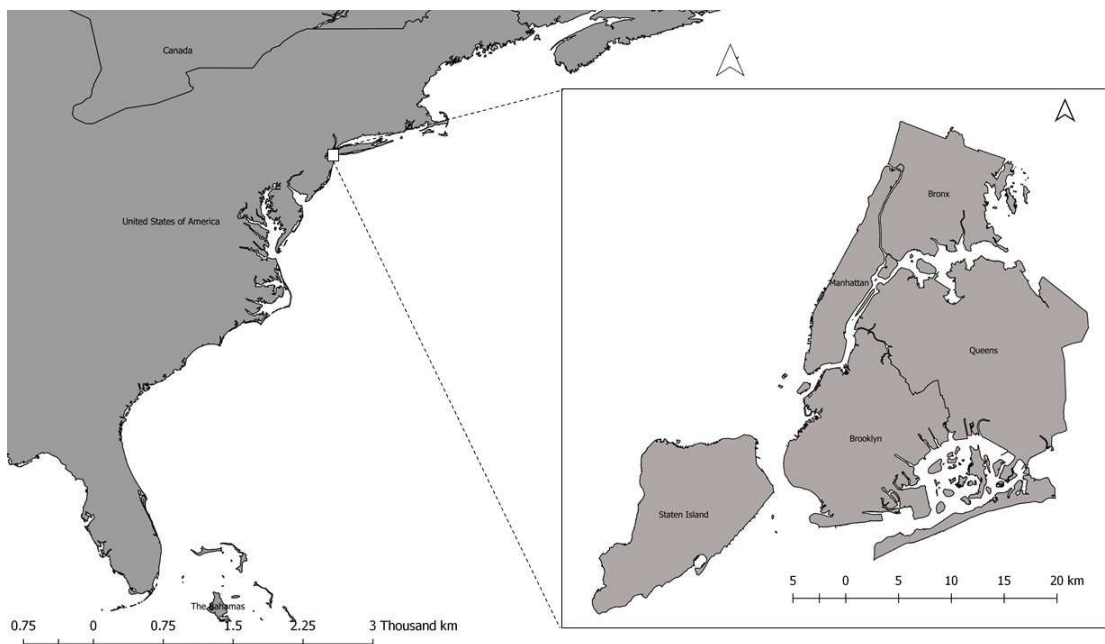

252

253 **Figure 1.** Location of New York City and the map of it boroughs (own elaboration).  
254

255

### 1.3.1. Heat waves

256

257

258

259

260

261

262

263

264

As mentioned above, heat waves in NYC are the largest cause of death due to socio-natural hazards (Depietri and McPhearson, 2018; NYC, 2014). Disastrous heat waves include the July 1966 event, where the mortality rate increased by 36% (Schuman, 1972) and the summer 1972 heat wave which caused 253 deaths on the 24<sup>th</sup> of July only (Ellis et al., 1975). According to the NYC Department of Health and Mental Hygiene, 46 heat stroke deaths resulted from two heat waves in July-August 2006 while 26 heat related deaths occurred during the heat wave of July 2013 (NYC, 2014, 2006). Between 2000 and 2011, 447 patients were treated for heat illness and 154 died (CDCP, 2013). A study by Madrigano et al. (2015) reported up to 234 heat related excess death for the same period. It has been documented that extreme heat impacts have been increasing at least for the period 1987-2005 (Anderson and Bell, 2011). However, numbers of deaths are

265 significantly less pronounced if compared to the first half of 20<sup>th</sup> century, showing an evidence of adaptation  
266 likely due to the use of air conditioning (Depietri and McPhearson, 2018; Petkova et al., 2014).

267

268 Risk to heat waves is driven by several factors. Those with poor socio-economic status, for example black  
269 (non-Hispanic) individuals, and the socially or linguistically isolated are more likely to die during a heat  
270 wave (Madrigano et al., 2015). People with chronic physical or mental health illnesses (i.e. cardiovascular  
271 disease, obesity, neurologic or psychiatric disease) also account for a large part of the causalities, together  
272 with individuals subject to alcohol or drugs abuse (CDCP, 2013; Ellis et al., 1975). The ageing population is  
273 the most at risk to suffer heat stroke during a heat wave (Luber and McGeekin, 2008; Oudin Åström et al.,  
274 2011). Madrigano et al. (2015) also found that greener neighborhoods were less at risk in NYC, potentially  
275 due to decreased temperatures in those areas of the city. Increased rates of poverty and higher densities of  
276 African-American populations were found to be highly correlated with the lack of green spaces in the city  
277 (Klein Rosenthal et al., 2014). Low income and crowding were also elements of risk in the 1966 heat waves  
278 according to Schuman (1972). Primary indicators of heat vulnerability are relatively consistent across studies  
279 with poverty, poor housing conditions, low access to air-conditioning and seniors' hypertension associated  
280 with elderly death due to heat stress in NYC between 1997 to 2006 (Klein Rosenthal et al., 2014).  
281 Environmental conditions, previous land cover and aggregated surface temperatures were also found to be  
282 positively associated with heat related deaths of elderly (Klein Rosenthal et al., 2014).

283

284 Gedzelman et al. (2003) calculated the UHI of NYC to be on average approximately 4 °C warmer than  
285 surrounding temperatures in summer and autumn and 3 °C in winter and spring according to measurement  
286 taken between 1997 and 1998 (Gedzelman et al., 2003). Temperatures have been rising in Central Park  
287 between 1900 to 2013 (Horton et al., 2015a) and it has been estimated that the temperature rose by 1.1 °C  
288 between 1900 to 1997 in NYC (Knowlton et al., 2007). One third of the total warming of the city since 1900  
289 was attributed to the intensification of the UHI. Projections show that this trend is likely to continue in the  
290 future, with warmer temperatures in NYC in the coming decades driven by UHI and increasing temperatures  
291 caused by climate change (Horton et al., 2015a). A study by Knowlton et al. (2007) showed that, despite the  
292 possibility to adapt to rising temperature, heat related premature deaths are likely to rise in projected future  
293 climates and affect regions also beyond the urban core of the city. Spatial and temporal patterns of current  
294 risk combined with projections for increasing temperatures and frequency and intensity of heat waves  
295 suggests the need for extensive planning and management to reduce heat risk in NYC.

296

### 297 **1.3.2. Inland floods**

298 In NYC, the built environment – dense and heavily paved built up area and reclaimed wetlands – limit the  
299 ground's capacity to absorb and drain water, raising the risk of urban or inland surface flooding. Sealed  
300 surfaces cover 72% of the NYC areas according to the city Department of Environmental Protection. Much  
301 of NYC's infrastructure, especially in low-lying or poor drainage areas, cannot cope with more than 1.5  
302 inches per hour of rainfall (Lane et al., 2013). According to NYC (2014), communities in low-lying areas

303 with limited drainage capacity tend to experience sewer backups, street and basement flooding that can  
304 expose them to contaminated storm water and wastewater. Combined sewer overflows, occurring when  
305 sewage and storm water are discharged from sewer pipes without treatment, because of the treatments plants  
306 are unable to handle flows, are frequent in NYC and are a significant source of environmental pollution  
307 (Rosenzweig et al., 2006; Rosenzweig et al. 2018). Excessive rain washes away pollutants from the streets  
308 which end up in the surrounding bodies of water. Exposure to contaminated water can have both short and  
309 long-term public health effects. Flooded basements and houses increase allergies, asthma and other  
310 respiratory illness from exposure to mold and fungus. However, flash floods in NYC are rarely life  
311 threatening because of the local topography (Lane et al., 2013).

312

313 Precipitation has increased at a rate of approximately 20.3 mm per decade from 1900 to 2013 in Central Park  
314 and this trend is likely to continue according to climate projections (Horton et al., 2015a). The city committed  
315 to a plan to invest in green infrastructures for storm water management, investing US\$ 5.3 billion and saving  
316 approx. US\$ 1.5 billion by spending a portion of this investment on green infrastructure in combination with  
317 traditional pipe and tanks improvements (NYC, 2010). The green infrastructures planned include green and  
318 blue roofs, rain gardens, permeable pavements, bioswales and the planting of street trees. However, inland  
319 flooding is likely to continue to pose significant risks to the urban residents of NYC.

320

### 321 **1.3.3. Coastal flooding**

322 Almost 33 square miles (about 85.5 square km) of NYC are within the equivalent of a 100-year floodplain  
323 (close to half of Brooklyn) (NYC, 2013). The most frequent coastal storms affecting NYC are nor'easters  
324 (i.e. storms along the East Coast of North America, so called because the winds over the coastal area are  
325 typically from the northeast, according to NOAA<sup>2</sup>). Even moderate nor'easters events can cause significant  
326 flooding (Colle et al., 2008) and are often associated with extended periods of high winds and high water  
327 (Rosenzweig et al., 2011). Extratropical first and then tropical cyclones tend to generate the greatest storm  
328 surge heights and flooding in NYC (Catalano and Broccoli, 2017; Smith et al., 2010; Towey et al., 2018),  
329 which can reach up to 5.12 m according to Lin et al. (2010). Extratropical storms account for 80%–85% of  
330 total precipitation from December to May and 93%–100% of extreme precipitation from November to May  
331 in the Northeastern coast of the U.S. (Agel et al., 2015). Hurricanes affect NYC more infrequently. However  
332 the associated flooding are being exacerbated due to the increase of sea level and the increase in the intensity  
333 of the hazard itself (Kemp and Horton, 2013; Reed et al., 2015b). Five major hurricanes of category 3 have  
334 affected the New York area between 1851 and 2010, mostly in the month of September (Blake et al., 2011)  
335 and generally lead to large damages (Rosenzweig et al., 2011). In 2012, Hurricane Sandy made landfall as a  
336 post-tropical cyclone in New Jersey with 70-kt maximum sustained winds, driving a catastrophic storm  
337 surge into the New Jersey and New York coastlines (Blake et al., 2013). In NYC the storm surge was of 2.81  
338 m and was at the origin of most of the damages and losses (Kemp and Horton, 2013). Hurricane Sandy caused

---

<sup>2</sup> <https://www.weather.gov/safety/winter-noreaster> (retrieved on the 16th of September 2018)

339 43 deaths in NYC alone and nearly half were adults aged 65 or older (Kinney et al., 2015). According to  
340 Lane et al. (2013), death was caused most frequently by drowning associated with the storm surge. Other  
341 deaths were caused by falling trees, falls, electrocution, and other traumas. Further, Sandy caused at least  
342 \$19 billion in economic losses to the city (NYC, 2013), left hundreds of thousands without power, some for  
343 many weeks (Lane et al., 2013). It was also found that power outages increase risk of death in NYC (Anderson  
344 and Bell, 2012). Five hospitals shut down due to Sandy, three of them had to evacuate patients after the storm  
345 hit because of flood damage to critical equipment; power losses in these facilities further complicated  
346 evacuation operations (Lane et al., 2013). Nearly 70,000 buildings were damaged by the storm or destroyed  
347 by related fire especially in south Brooklyn, South Queens and Staten Island; the subway system was  
348 seriously affected; roads, railroads and airports were flooded; while the communication system was disrupted  
349 in many areas (NYC, 2013).

350

351 Since Hurricane Sandy, the city established a US\$20 billion plan to adapt to climate extremes with 257  
352 initiatives which span from coastal protection, economic recovery, community preparedness and response,  
353 and environmental protection and remediation (NYC, 2013). Additionally, the Mayor's Office of Housing  
354 Recovery Operations was established in 2013 to oversee housing recovery in NYC.

355

356 Increasing hurricane intensity over time has been detected (Gornitz et al., 2001; Knutson et al., 2015).  
357 Additionally, three of the nine highest recorded water levels in the New York Harbor region have occurred  
358 since 2010, and eight of the largest twenty have occurred since 1990 (Talke et al., 2014). 40% of sea level  
359 rise in NYC is driven by subsidence and the rest by global climate change, amounting in total to 25,4 mm  
360 per decade since 1900 (Horton et al., 2015b). Due to sea level rise, which is projected to accelerate during  
361 this century to reach up to 1.2 m in the coming century (Kopp et al., 2014), coastal flooding in NYC is  
362 expected to become more frequent and intense, even in absence of changes in intensity and frequency of  
363 storms (Colle et al., 2008; Gornitz et al., 2001; Horton et al., 2015b). A recent study has shown that, by 2030-  
364 2045, the megacity could be affected by significant flooding on average every 5 years (Garner et al., 2017).  
365 This is ever more significant when considering the high and increasing concentration of assets and people  
366 exposed in the coastal areas of the city (Aerts and Botzen, 2012). According to Aerts et al. (2013), the  
367 estimated flood damage to buildings for NYC is between US\$ 59 and 129 million/year, while the damage  
368 caused by a 100-year storm surge is within a range of US\$ 2 to 5 billion.

369

## 370 **2. Methods**

### 371 **2.1. Multi-hazards events in New York City and indicators weighting**

372 We assessed past heavy precipitation and extreme high temperatures recorded in Central Park from 1876 to  
373 date and made available by the US National Oceanic and Atmospheric Administration (NOAA) to examine  
374 how temporally consecutive events which occur in the city, this as part of a broader study presented in  
375 Depietri and McPhearson (2018). We carried out an analysis of daily NOAA's meteorological records  
376 (including daily precipitation, max and min temperatures) to identify dates in which an event of extreme heat

377 would be immediately followed by a storm (or vice versa), two consecutive heat waves events (happening  
378 within 3 days from each other's) and consecutive flooding events (two consecutive days of extreme  
379 precipitation). We then manually investigated the New York Times database for relevant articles appearing  
380 in the edition of the day following the multi-hazard event identified, this to analyze more in depth the  
381 occurrence and social, infrastructural and economic impact of cumulative events. We then conducted a survey  
382 of local experts and decision-makers with a principal objective to collect weights multi-hazard risk  
383 assessment for indicators and sub-indicators selected, but also to collect information of past and future,  
384 potential multi-hazards event occurring in the city.

385

386 For the survey, we drafted a comprehensive list of the local authorities' representatives, researchers and other  
387 local actors such as NGOs whose daily work is related to different aspects of vulnerability and risk to hazards  
388 in NYC. The respondents to the survey were thus identified as being highly knowledgeable and have  
389 experience of the local hazard risks and impacts. The institutional, urban planning, environmental planning,  
390 disaster risk reduction, health and social sectors were represented in the survey. A total of 122 invitation e-  
391 mails were sent to contact persons belonging to local and federal institutions as well as local NGOs. Of these,  
392 10 were no longer valid and we subsequently collected 65 responses with a 58% response rate. The survey  
393 was anonymous but almost 60% of the respondents belonged to local jurisdictions, about 15% to NGOs, 10%  
394 to local universities, while state agencies, federal agencies, and companies represented less than 5% each.  
395 No further information about the respondent identity were collected to ensure anonymity.

396

397 The list of indicators and sub-indicators weighted by the respondent of the questionnaire were derived from  
398 the relevant literature and the final list included those indicators able to describe the vulnerability to the three  
399 hazards jointly for which data was available. For the weighting of indicators, we adopted the method of  
400 budget allocation, a participatory method (Saisana and Tarantola, 2002). Respondents were asked to rate each  
401 indicators by assigning 100 points distributed amongst the set of indicators describing the composite index.  
402 Final weights were derived by averaging the scores assigned by each respondent and dividing the means by  
403 100. The weights thus derived were normalized to a fraction of to 1 for each category. Unlike other methods  
404 such as analytic hierarchy process (AHP) and Delphi, the technique of budget allocation is intuitive,  
405 computationally simple, but accurate, and therefore widely used (Saisana and Tarantola, 2002). The weights  
406 obtained are listed in Tables 1 and 2. Additional questions in the survey were related to multi-hazard risk in  
407 NYC and the city preparedness to cope with different hazards. The results are presented in section 3.1.

408

## 409 **2.2. Multi-hazard risk assessment**

410 We assessed multi-hazard risk to the main three hydro-meteorological hazards affecting NYC described  
411 above. In this study, we emphasize the inclusion of social factors of risk by adapting our methodology from  
412 Greiving (2006) who carried out a multi-hazard risk assessment at the country level for Europe and from  
413 Johnson et al. (2016) who applied a similar methodology to the case of two Hong Kong districts. Overall, the  
414 methodology consists of generating hazards maps, one for each hazard (which are then combined in a multi-



415 hazards map) and a common vulnerability map to the three hazards that includes socio-economic indicators.  
416 We then obtained the final risk map as the product of the combined multi-hazards map and the common  
417 vulnerability map. Note that all variable used have been normalized and expressed as levels, ranging from 1  
418 to 5, of hazards intensity, exposure, susceptibility, lack of coping capacity and then vulnerability and risk  
419 This normalization, widely in use in vulnerability and risk assessments, allowed us to conduct analyses across  
420 different, otherwise incommensurate, variables.

421

### 422 **2.2.1. Hazards mapping**

423 multi-hazard risk assessment consists of an initial study of combined hazards which overlap temporally and  
424 spatially in the megacity. We created a raster surface for each hazard by categorizing the hazard intensity  
425 into five ordinal scales of 1 to 5, which are equivalent to standardized hazard levels of very low, low, medium,  
426 high and very high. We used Natural Break (Jenks) method of data classification in ESRI's ArcGIS software  
427 as the method considers both the span of values and the number of observations for each category (Smith et  
428 al., 2007), and is widely used for classification in mapping (Huang et al., 2011).

429

430 Especially in the urban context, hazards present a significant social component which magnify impacts due  
431 to the high modification of the environment. For creating heat wave hazard surface, we maintained that the  
432 hazard affects the entire city with different intensities according to two aggravating factors: surface  
433 temperature and air pollution. Surface temperature was derived from thermal band of 2011 Landsat imagery  
434 captured on the 15<sup>th</sup> and 31<sup>st</sup> of July, while air pollution layer was developed based on raster surfaces of 300-  
435 meter resolution for 2010 with annual average values of PM<sub>2.5</sub> and ozone O<sub>3</sub> concentrations. PM<sub>10</sub> and O<sub>3</sub> are  
436 the main contributors to extreme heat mortality besides heat itself (see Depietri et al., 2011 for a review). We  
437 acquired the air pollution data from New York City Community Air Survey (NYCCAS) carried out by the  
438 New York City Department of Health and Mental Hygiene, Queens College Center for the Biology of Natural  
439 Systems, and Zev Ross Spatial Analysis. Indicators used to develop the heat hazard map were weighted  
440 according to the survey responses (see Table 1 and Equation 1 and 2), and then combined resulting in a raster  
441 surface with values ranging from 1 to 5.

442

$$443 \quad AP = 0.483 O + 0.517 PM \quad (\text{Eq. 1})$$

$$444 \quad HW = 0.632 ST + 0.367 AP \quad (\text{Eq. 2})$$

445

446 where AP stands for air pollution, O for ozone and PM for particulate matter smaller than 2.5µm. HW stands  
447 for heat wave hazard and ST for surface temperature.

448

449 The inland flooding map was derived through a spatial interpolation of 311 calls for street flooding (data  
450 available between January 2010 and December 2015) and basement flooding (data available between July  
451 2011 and December 2015). The 311 calls were obtained from a spatial database developed and maintained  
452 by the city of New York which comprises of all sorts of complaint calls. When preparing the inland flooding

453 layer, we removed from the dataset the complaint points that had been recorded during or one day after the  
 454 event of coastal storms, this to maintain differences between precipitation driven inland flooding and coastal  
 455 flooding driven by storm surges. The dates and times of storm surges in NYC coastal area were obtained  
 456 from NOAA’s storm events database<sup>3</sup> under the keywords “coastal flooding”, “high surf”, “tropical storm”,  
 457 “storm surge/tide”. The 311 calls dataset has nonetheless some limitations worth a mention. For instance, it  
 458 does not account for possible differences in the likelihood of reporting flooding amongst populations (e.g.  
 459 depending on income). However, this is the only available dataset on inland flood occurrence and allows us  
 460 to consider one of the most frequent and perennial natural hazards affecting NYC – flooding driven by  
 461 precipitation. Still, NOAA tide gauge data at the Battery in NYC is a useful source of continuously recorded  
 462 water surface elevation and therefore could be used as an indicator of storm surge heights, though not  
 463 included in this analysis.

464  
 465 For coastal flood inundation we used the local expert map obtained from the NYC Office of Emergency  
 466 Management (OEM) with hurricane inundation zones published in 2013. Local authorities suggested that we  
 467 adopt the hazard map produced after Hurricane Sandy as this would be a more conservative starting point.  
 468 However, we opted for the general map considering multiple levels of hazard as this had predefined  
 469 categories of hazard and thus was better able to be compared with the other hazards in a multi-hazard analysis.

470  
 471 The hazards’ weights reported in Table 1 indicate that, according to the surveyed respondents, higher impacts  
 472 would be caused by coastal hazards. This result might be justified by considering the recent occurrence of  
 473 Hurricane Sandy and its high impacts which triggered high concern amongst local authorities. A final multi-  
 474 hazard map (H) was generated by adding weighted values of the three hazard layers (IF - inland flooding; CF  
 475 - coastal flooding), as presented in Equation 3. The resultant composite hazard layer also has values ranging  
 476 between 1 and 5 to represent the five respective classes of hazard intensity.

477  
 478 
$$H = 0.378 HW + 0.205 IF + 0.417 CF \quad \text{(Eq. 3)}$$

479  
 480 The weighted linear combination of the three hazards intensities considers the hazards to spatially overlap  
 481 without any additional quantifiable interactions.

482  
 483 **Table 1.** Hazard indicators selected, and weights derived from the survey.

|                    |                        | Weight | Indicator                | Weight | Sub-indicator | Weight |
|--------------------|------------------------|--------|--------------------------|--------|---------------|--------|
| <i>Hazards (H)</i> | <i>Heat waves (HW)</i> | 0.378  | Surface temperature (ST) | 0.632  |               |        |
|                    |                        |        |                          | 0.367  | Ozone (O)     | 0.483  |

<sup>3</sup> <https://www.ncdc.noaa.gov/stormevents> (retrieved on February 23rd 2017)

|  | Weight | Indicator                  | Weight | Sub-indicator                  | Weight |
|--|--------|----------------------------|--------|--------------------------------|--------|
|  |        | Air pollution (AP)         |        | Particulate Matter <2.5µm (PM) | 0.517  |
|  | 0.205  | 311 calls                  |        |                                |        |
|  | 0.417  | Hurricane inundation zones |        |                                |        |

484  
485  
486  
487  
488  
489  
490  
491  
492  
493  
494  
495  
496  
497  
498  
499  
500

### 2.2.2. Vulnerability and risk maps

To be compatible with computation of hazard layers, we developed raster surfaces of 30m spatial resolution for different socio-economic and demographic variables relevant for the three hazards, describing the three components of vulnerability as listed in Table 2. For this reason, we disaggregated the 2010 census data made available by the US Census bureau at the block group level. Disaggregation of census data using dasymetric approaches to a finer spatial scale follows Mennis and Hultgren (2006). We used the number of residential units, land use type, and building type as ancillary information to convert demographic totals from census block groups to spatially corresponding cadastral lots for each vulnerability indicator. The disaggregated data layers were then resampled to a spatial resolution of 30 m to maintain uniformity with the spatial resolution of hazard data layers. These data were used to derive a vulnerability map based on indicators describing exposure, susceptibility and lack of coping capacity. Selection of these indicators stemmed from the review of available literature covered in sections 1.3.1 to 1.3.3 and the weights derived from the survey are presented in Table 2.

**Table 2.** Vulnerability indicators and weights derived from the survey.

|                          | Component                           | Indicator                   | Weight               |
|--------------------------|-------------------------------------|-----------------------------|----------------------|
| <i>Vulnerability (V)</i> | <i>Exposure (E)</i>                 | Population (P)              |                      |
|                          |                                     | <i>Susceptibility (S)</i>   |                      |
|                          |                                     | Pop over 65(EI)             | 0.351                |
|                          |                                     | Children (<18) (C)          | 0.212                |
|                          |                                     | 1- Median income (I)        | 0.191                |
|                          |                                     | African Americans (AA)      | 0.170                |
|                          |                                     | No schooling completed (NS) | 0.117                |
|                          | <i>Lack of coping capacity (CC)</i> |                             | Speak no English (L) |
|                          |                                     | One-person household (HH)   | 0.484                |

501  
502  
503  
504  
505  
506  
507  
508

Vulnerability is defined as the “propensity of exposed elements such as physical or capital assets, as well as human beings and their livelihoods, to experience harm and suffer damage and loss when impacted by single or compound hazard events” (Birkmann et al., 2013, p. 195). This vulnerability perspective in risk reduction particularly looks at the socio-economic, institutional and cultural conditions of people and physical assets which can be affected by a hazard as well as at their capacity to prevent and cope with the impacts of that event. As mentioned, in Birkmann et al. (2013, p. 200), vulnerability is described through three components defined above: exposure, susceptibility and lack of coping capacity.

509

510 The first step in the socio-economic vulnerability assessment was to identify the exposed subjects. Exposure  
511 (E) was calculated as the number of inhabitants (P) for each 30 x 30 m spatial unit. The other two components  
512 of vulnerability are susceptibility (S) and lack of coping capacity (CC). Like the hazards mapping described  
513 above, we reclassified each of the indicators into five intensity categories represented by the values of 1 to 5  
514 in such a way that 5 represents the highest level of intensity. For example, smaller values in median income  
515 layer represent higher degree of susceptibility and hence were given higher intensity values. The two  
516 components of vulnerability (S and CC) were calculated according to Equation 4 and 5:

517

$$518 \quad S = 0.351 EL + 0.212 C + 0.191 I + 0.170 AA + 0.117 NS \quad (\text{Eq. 4})$$

$$519 \quad CC = 0.516 L + 0.484 HH \quad (\text{Eq. 5})$$

520

521 where EL stands for elderly, C for children, I for median income, AA for African Americans, NS for no  
522 schooling, L speak no English, HH one-person household. We aggregated the indicators as a weighted sum,  
523 as each indicator contributes for a fraction of the susceptibility or lack of coping capacity. The S and CC  
524 layers thus generated have values ranging between 1 and 5.

525

526 Some indicators (i.e. homes in deteriorated or dilapidated buildings, mold in home, asthma, heart attack  
527 hospitalizations, overweight, adults reporting heavy drinking, crowding, air conditioning, adults with  
528 personal doctor and adults with health insurance) were considered but excluded in the final list because they  
529 were not available at the low scale for NYC or because some were not relevant for the three hazards when  
530 jointly considered. Respondents to the survey also suggested some additional indicators to consider and are  
531 summarized in the results section.

532 The final vulnerability (V) map was generated by adding exposure (E), susceptibility (S) and lack of coping  
533 capacity (CC) layers with equal weights (Equation 6):

534

$$535 \quad V = \frac{1}{3}E + \frac{1}{3}S + \frac{1}{3}CC \quad (\text{Eq. 6})$$

536

537 We aggregated the three components of vulnerability by summing equally weighted values, a general  
538 approach adopted in the literature due to the difficulty to assigning different weights to these three  
539 components (see for instance Welle and Birkmann, 2015). Risk to natural hazards, such as hydro-  
540 meteorological, climatological or geophysical hazard, is the combination of the probability or likelihood in  
541 time and space of a natural hazard to occur and to affect a vulnerable system (UNISDR, 2015). In the disaster  
542 risk reduction literature, risk is commonly defined as the product of hazard and vulnerability. The final  
543 aggregated risk map was calculated by multiplying the final aggregated hazard map with the vulnerability  
544 map (see Equation 7):

545

546  $R = H * V$  (Eq. 7)

547

548 where R is risk, H is multi-hazards and V vulnerability. We multiplied hazard per vulnerability because,  
549 following to the definition of risk, with no hazard or no vulnerabilities there would be no risk. The final risk  
550 map thus derived comprises of 16 classes with the values ranging from 1 to 25. As for the hazard and  
551 vulnerability maps mentioned above, the final aggregated risk is also displayed using five intensity classes.

552

553 Our method of aggregation, which first quantifies the indicators of hazard and vulnerability into five ordinal  
554 categories and then uses weighted linear combination, is drawn from the existing literature hazard and  
555 vulnerability assessment. Previous studies on hazard risk mapping have documented the robustness and  
556 accuracy of this method (Greiving, 2006; Greiving et al., 2006; Johnson et al., 2016; Michael and Samanta,  
557 2016; Zhou et al., 2016).

558

559 To compare the plausibility of our results, we also followed an additional method of aggregation, which is  
560 collectively described as the fuzzy-defined weighted combination (Aydi et al., 2013; Janke, 2010). We  
561 followed the same procedural steps, weights, and aggregation formulae except that the numerical values of  
562 each of the hazard and vulnerability layers were standardized between 0 and 1 (i.e. 0-100%) instead of the  
563 five ordinal classes. When displayed the final risk layer by reclassifying into five categories based on natural  
564 break (Jenks), the map was very similar to the final map generated following the method we describe above.

565

### 566 3. Results

#### 567 3.1. The qualitative results of the NOAA-NYT search and the survey

568 Most of the temporally overlapping extreme events identified in NOAA database between 1876 to 2016 were  
569 related to multiple heat waves happening at distance of up to 3 or 4 days (13 events), followed by two  
570 consecutive days of extreme precipitation (9 events) and days of extreme heat followed by high precipitation  
571 (3 events). However, thanks to a broader review carried out on the New York Times and described in Depietri  
572 and McPhearson (2018), we were able various additional interrelated multi-hazards incidents in NYC,  
573 meaning that multi-hazard events have more interrelated impacts which might not depend only on the high  
574 intensity of the hazard alone.

575

576 The stakeholders who compiled the questionnaire were also asked to provide information related to past and  
577 present multi-risk events as well as strategies that they would prioritize for the city. In a multi-hazard  
578 perspective, the results of the survey indicated that heat waves in NYC would highly positively interact (i.e.  
579 increasing their impacts) with droughts, but also with inland and coastal flooding, although these would have  
580 opposed interactions too. Inland and coastal flooding can have additive impacts if they occur at the same time  
581 or successively. Furthermore, respondents indicated that other interactions between the wider ranges of  
582 hazards affecting NYC have occurred in the past and may occur in the future (summarized in Table 3 and 4

583 respectively). In our study we cover many of these situations although further analysis can be envisaged to  
 584 better understand the interaction between the hazards and infrastructures failures chiefly.

585

586 **Table 3.** List of multi-hazard events that happened in the past according to the respondents of the  
 587 questionnaire.

588

| Type | Combination of multi-hazard events that occurred in NYC in the past |
|------|---------------------------------------------------------------------|
| 1    | Hurricane &<br>Cold spell &<br>Inland flooding                      |
| 2    | Heat waves &<br>Thunderstorms &<br>Inland flooding                  |
| 3    | Hurricane &<br>Infrastructure failure                               |

589

590 **Table 4.** List of multi-hazards events that the city should adapt to as these could occur in the future.

591

| Type | Combinations of multi-hazard events that could occur in NYC |
|------|-------------------------------------------------------------|
| 1    | Coastal flooding &<br>Exposure to toxic substances          |
| 2    | Coastal flooding &<br>Inland flooding                       |
| 3    | Coastal flooding &<br>Cod Spell                             |
| 4    | Coastal storms &<br>Power outages                           |
| 5    | Heat waves &<br>Hurricane                                   |
| 6    | Heat waves &<br>Power outages                               |
| 7    | Heat waves &<br>Severe thunderstorm                         |
| 8    | Heat waves &<br>Drought                                     |

592

### 593 3.2. Multi-hazard risk assessment

594 Figures 2 a, b, and c present the mapped analytical results for each of the three hazards considered. Except  
 595 for heat stress, which is distributed across the whole city with points of low hazard intensity corresponding  
 596 to the urban parks, the hazards intensities are mainly concentrated along the coast, especially in Manhattan  
 597 and in Brooklyn.

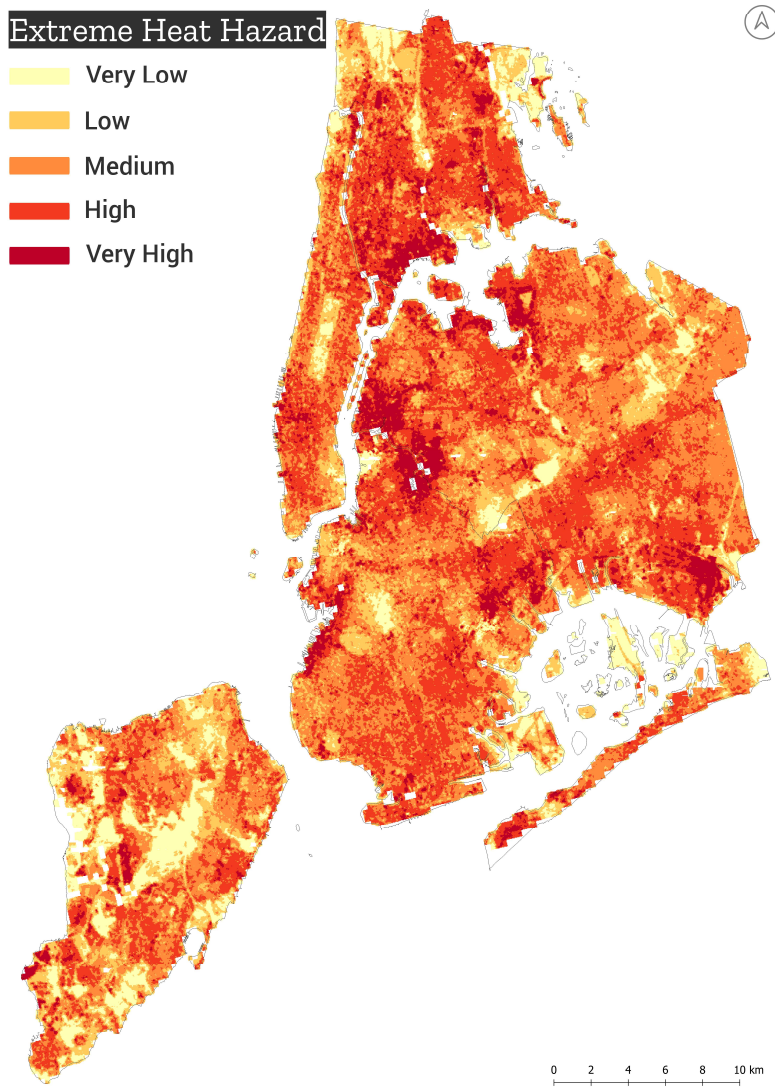

a. Map of the heat stress based on surface temperature and air pollution

598

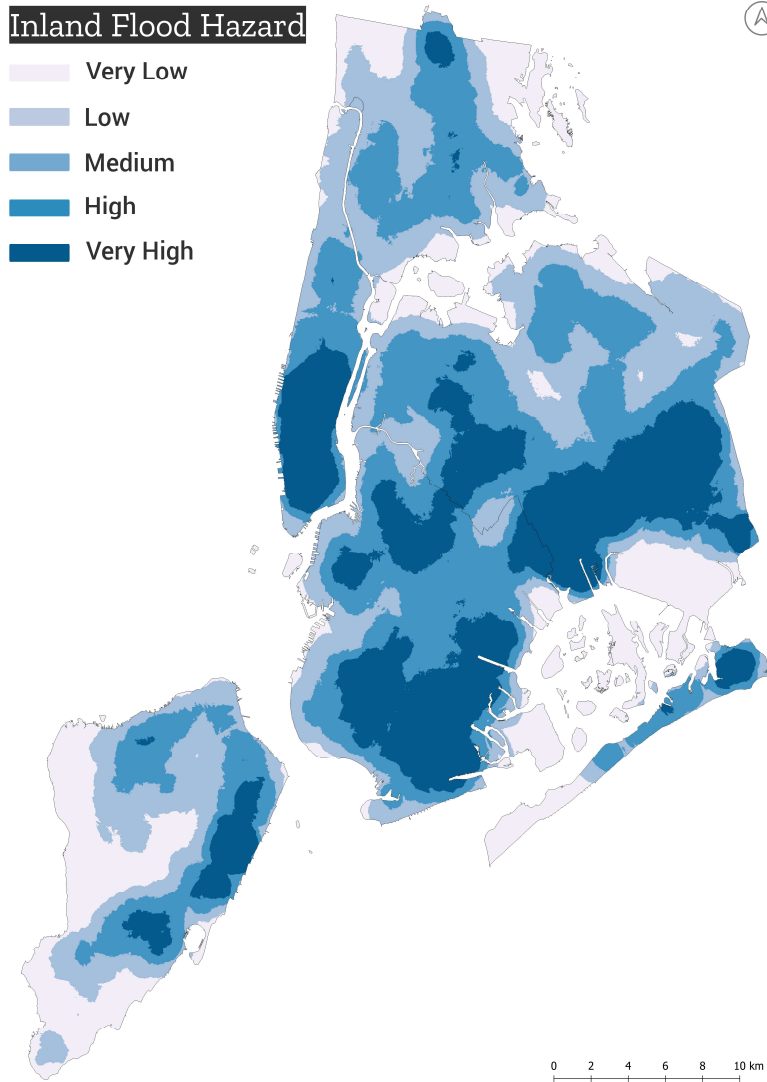

**b.** Map of the inland flooding based on the 311 calls for street flooding or basement flooding

599  
600



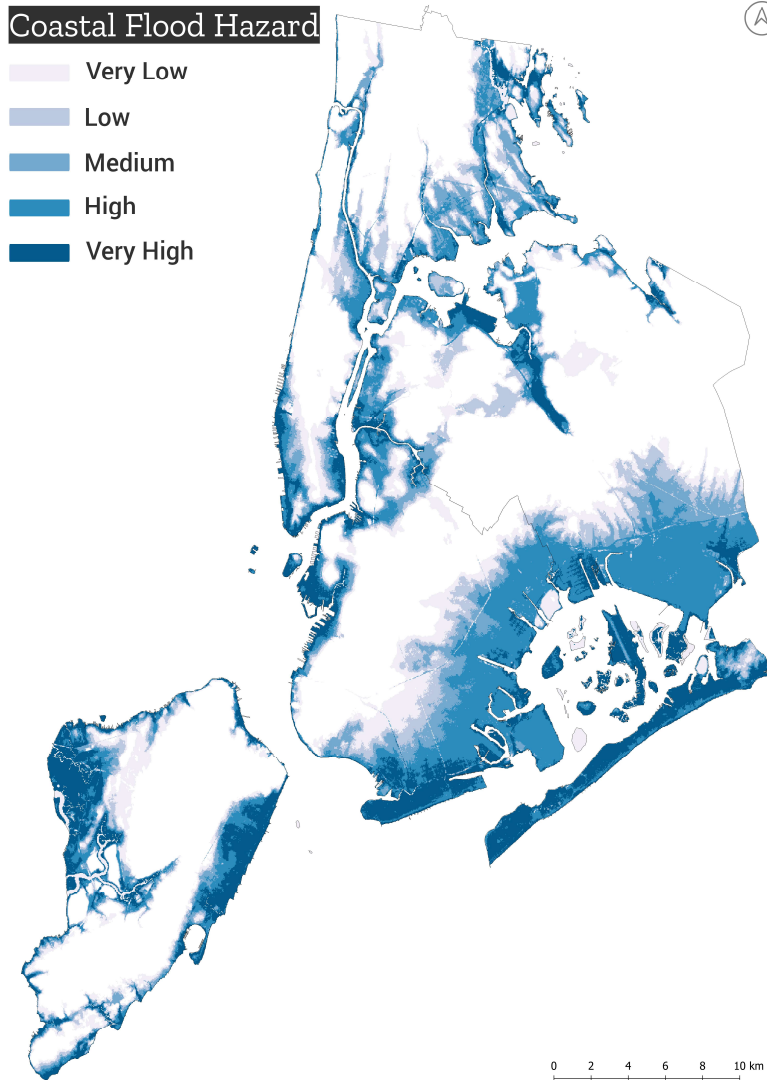

c. Hurricane inundation zones based on the map provided by the Office of Emergency Management

601  
602  
603  
604

**Figure 2 a, b and c.** Spatial variation in heat hazard, inland flooding hazard, and coastal flood hazard for New York City.

605  
606  
607

Figure 3 displays the joint multi-hazard map with higher intensities in most of the coastal areas. Coastal flooding was assigned a larger weight with respect to the other two hazards based on survey responses, which drives the hotspot analysis somewhat. At present the city is still largely unprepared to cope with flooding and is highly exposed to this type a hazard, a condition that was particularly clear after Hurricane Sandy. Inland flooding was shown to be most intense along the coast, further strengthening the presence of hazards along coastal areas, though further modeling is required to better understand the drivers of inland flood hazards and where they are likely to occur in the future.

611  
612

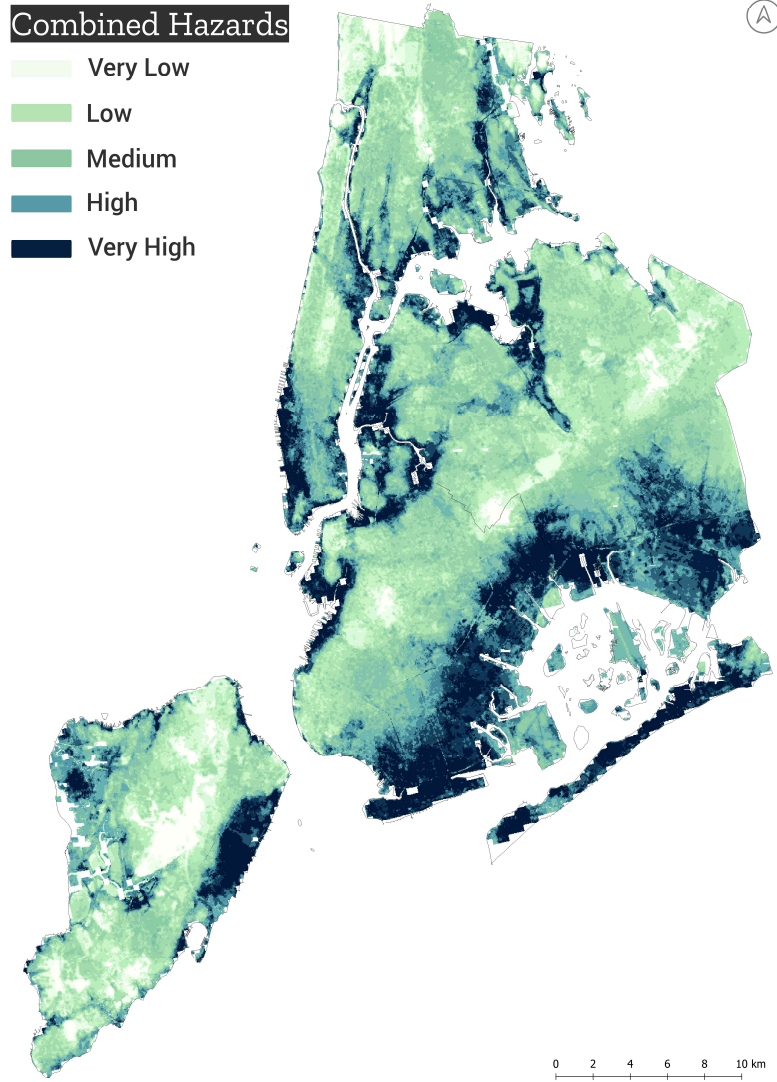

614  
615

616 **Figure 3.** Spatial variation in the combined hazards including weights derived through expert input.

617  
618

**Exposure**

- Very Low
- Low
- Medium
- High
- Very High

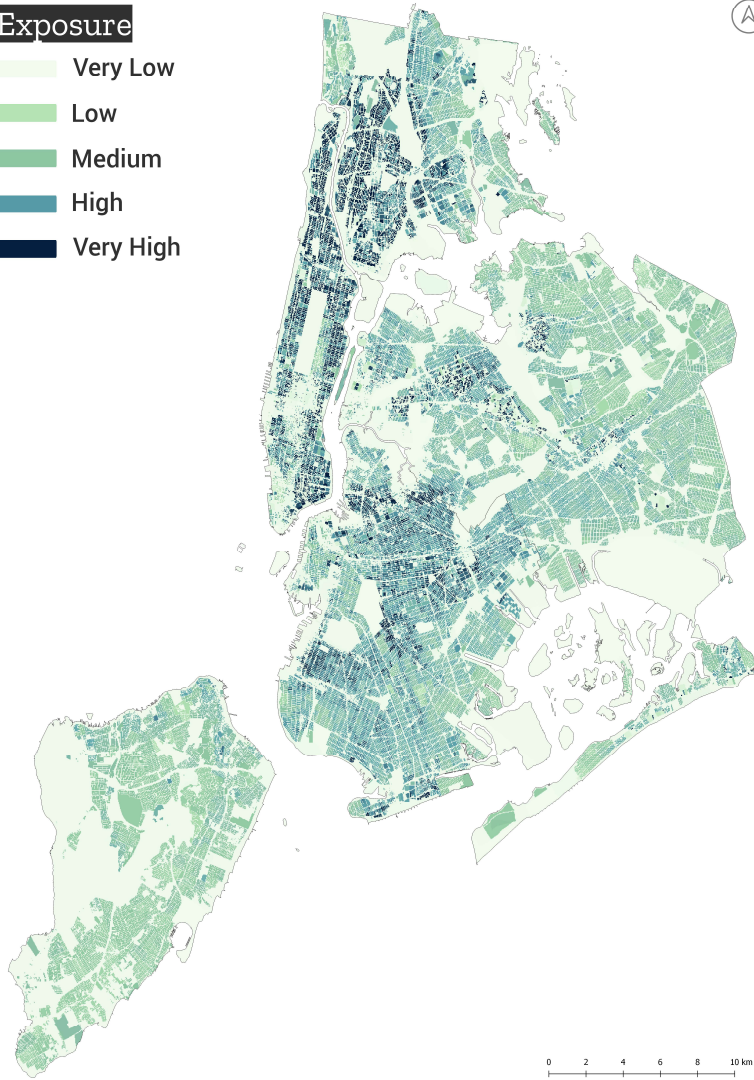

619  
620

a. Map of exposure

621

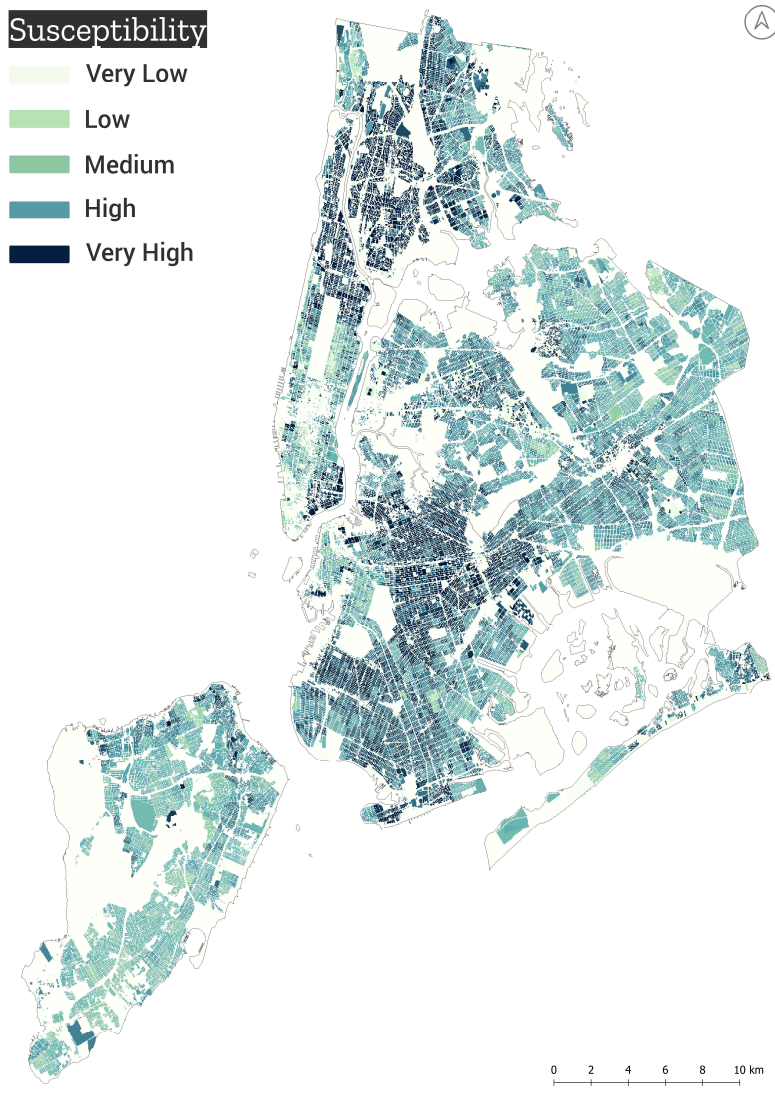

**b. Map of susceptibility**

622

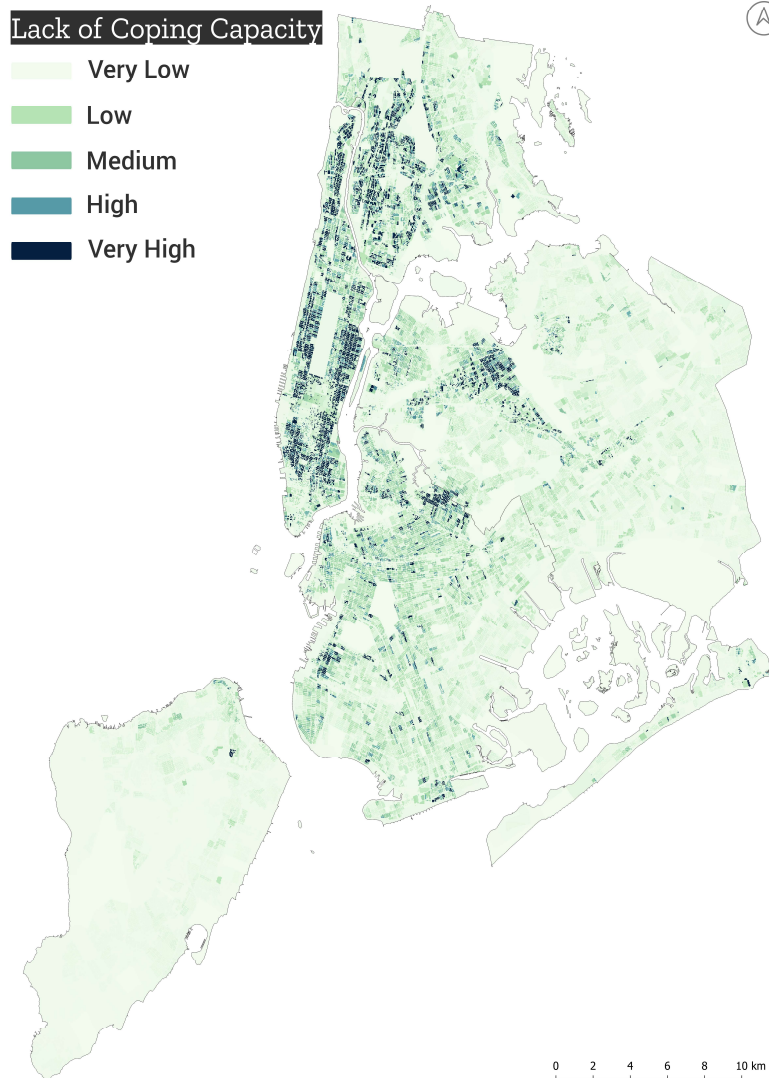

c. Map of lack of coping capacity

623  
 624 **Figure 4 a, b and c.** Spatial variation in three components of vulnerability (exposure, susceptibility and  
 625 lack of coping capacity) to multiple hazards.

626  
 627 Figure 4a shows the exposure of the city based on the population. Since Manhattan has the highest density,  
 628 it is where the highest exposure values are found. Parts of Brooklyn and the Bronx also have high densities  
 629 but are overall less concentrated than Manhattan. The susceptibility map of the city (Figure 4b) shows that  
 630 the most fragile members of the population in socio-economic terms are in some parts of Brooklyn and the  
 631 Bronx. As most people living alone are in Manhattan, this area shows higher values of lack of coping  
 632 capacity. While linguistic isolation (non-English speaking) explains some lack of coping capacity in part of  
 633 Brooklyn and the Bronx (Figure 4c).

634



# Vulnerability

- Very Low
- Low
- Medium
- High
- Very High

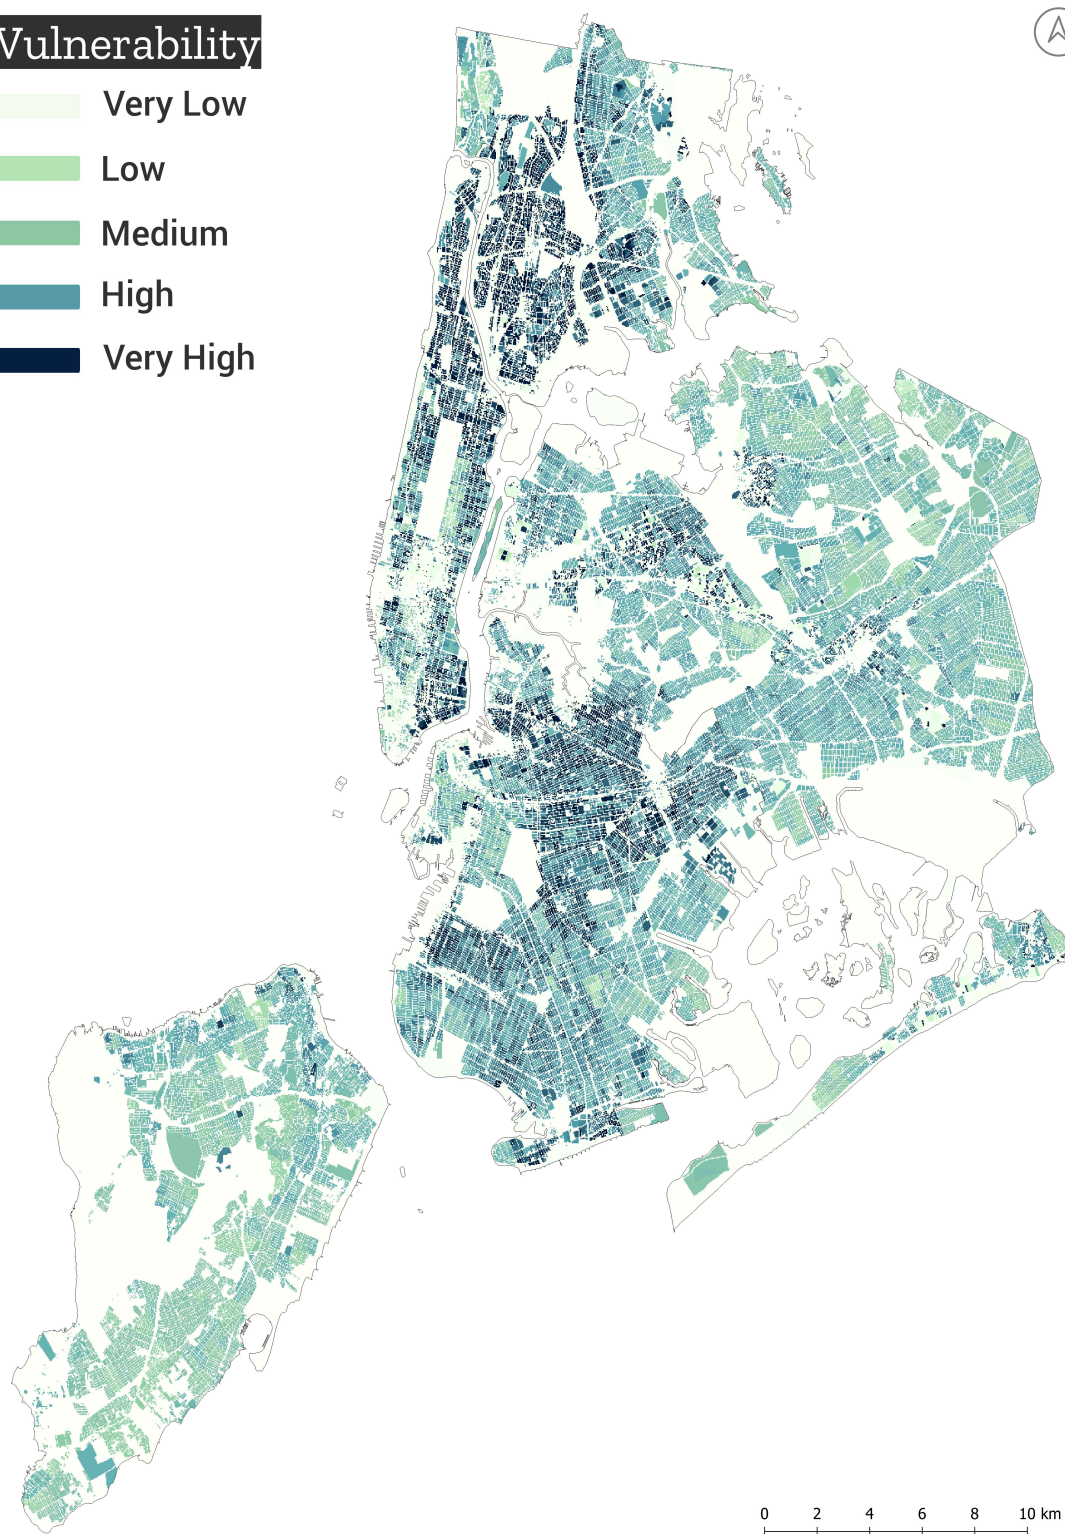

635  
636  
637  
638

Figure 5. Map of Vulnerability

639 The resultant vulnerability map (Figure 5) shows highly vulnerable populations located mainly in the Bronx,  
640 large parts of Brooklyn and some parts of Manhattan (such as Harlem) and the Queens. Staten Island appears  
641 as the least vulnerable compared to other parts of the city.

642  
643 The survey’s respondents suggested other important indicators that can be considered in a vulnerability  
644 assessment (see Table 5). These fall into the categories of indicators that we had to exclude either because  
645 they were not directly relevant to the three hazards we focused on jointly, or because data were unavailable  
646 at the spatial scale we conducted our analysis. Despite their exclusion from the study, we report these results  
647 as a useful piece of information for further research.

648  
649 **Table 5.** Indicators that have been suggested by the survey and that could be further integrated in this type  
650 of assessment depending on the availability of the data.

| <b>Additional Indicators</b>                    |                                      |
|-------------------------------------------------|--------------------------------------|
| Disabled                                        | Air conditioning and cooling centers |
| Power housing                                   | Health conditions                    |
| Type of housing structure                       | Proximity to transportation          |
| Political orientation as a measure of awareness | Housing conditions                   |
| Family size                                     | Proximity to nuisance flooding       |
| Social isolation                                | Proximity to industries              |
| Location of the house                           | Undocumented residents               |
| Home ownership vs rent occupier                 | Below poverty Status                 |
| Social Cohesion                                 | Access of equity capital             |

651  
652

**Risk**

- Very Low
- Low
- Medium
- High
- Very High

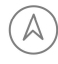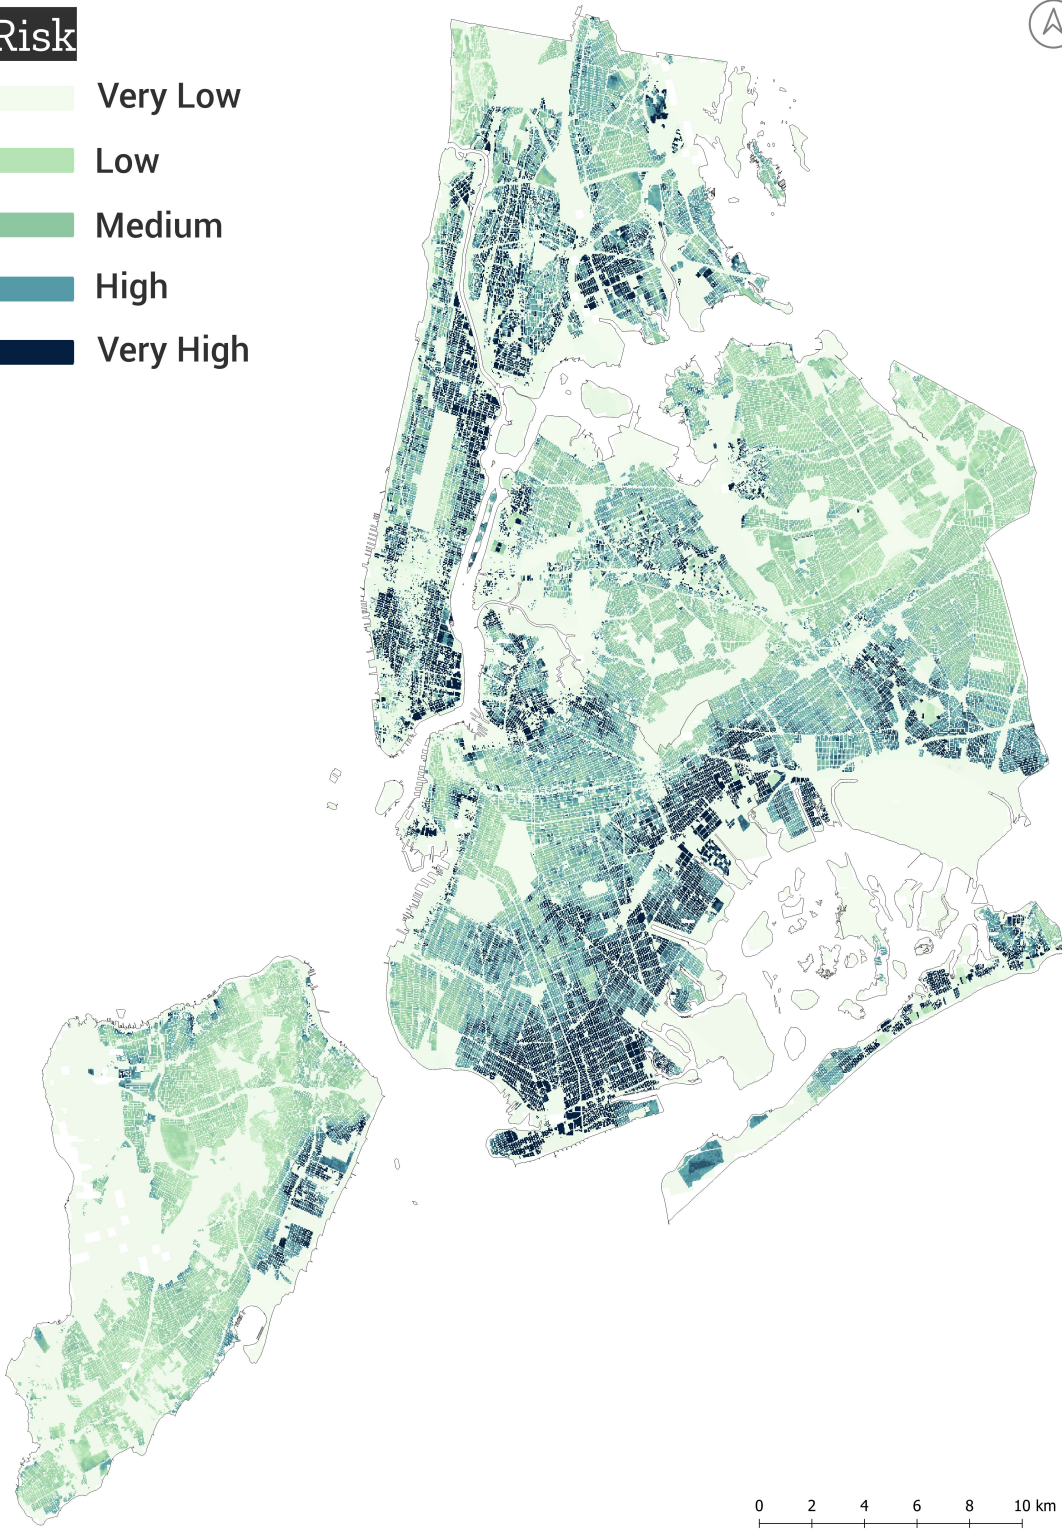

a. Multi-hazard risk map



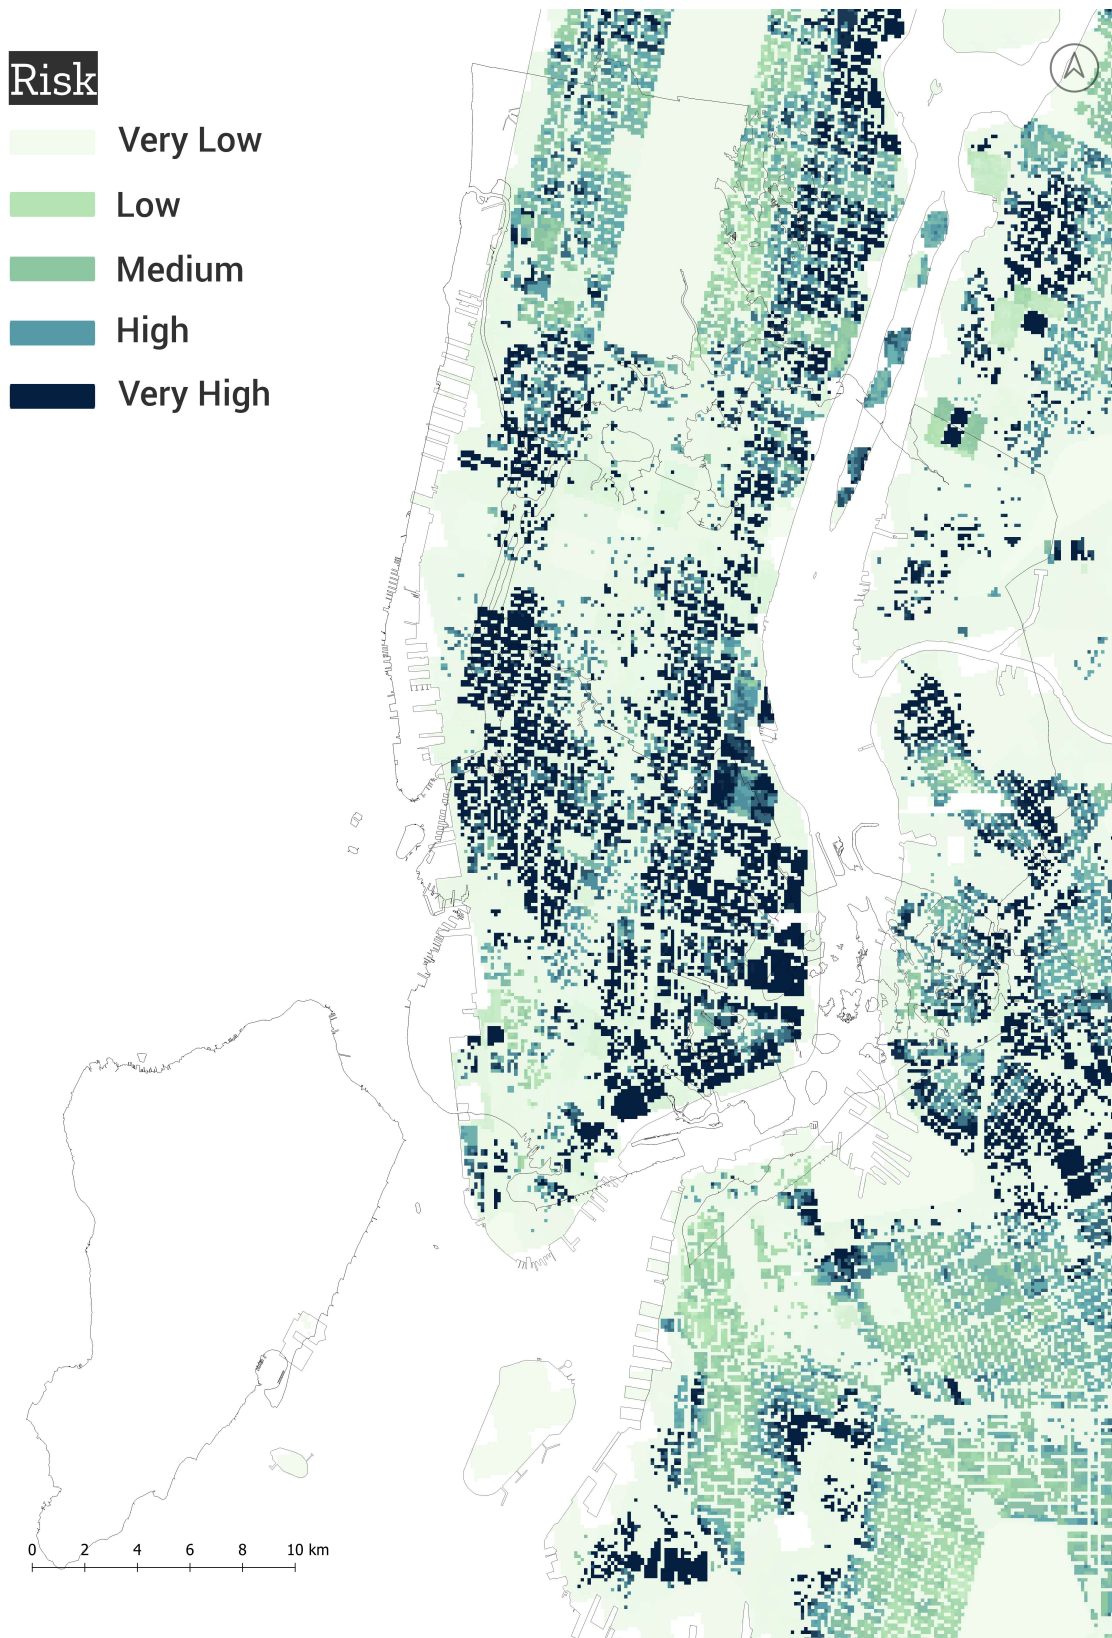

b. Detail of the multi-hazard risk map

655 **Figure 6 a and b.** Final multi-hazard risk map and detail of the high spatial resolution risk map for Lower  
656 Manhattan and parts of Brooklyn.  
657

658 Combining multiple hazards and vulnerability assessment produced final multi-hazard risk assessment map  
659 at high resolution for NYC (Figure 6a). We find that the coastal areas of Brooklyn, Manhattan and Harlem  
660 are the most at risk from the three hazards considered given the methodological approach and expert input  
661 affecting weighted indicators. Figure 6b, shown in detail, demonstrate the relatively high spatial resolution  
662 of the analysis and the utility for decision-making for prioritizing investments within neighborhoods and  
663 down to building scale for multi-hazard risk reduction.  
664

665 Adapting to coastal threats remains a high priority for the city post-Sandy, but results here suggest that coastal  
666 areas are also at risk from a multi-hazard perspective. This result is further supported from expert input  
667 gathered through the survey of local stakeholders who see the city the least prepared to cope with coastal  
668 flooding, second only to earthquakes (see Figure 7). Of note is that some of responses appear to be  
669 contradictory, e.g. snowstorms are often associated with nor'easters while hurricanes are associated with  
670 coastal flooding with different degrees of preparedness. This inconsistency might be explained by the variety  
671 of hazards respondents were asked to assess.  
672

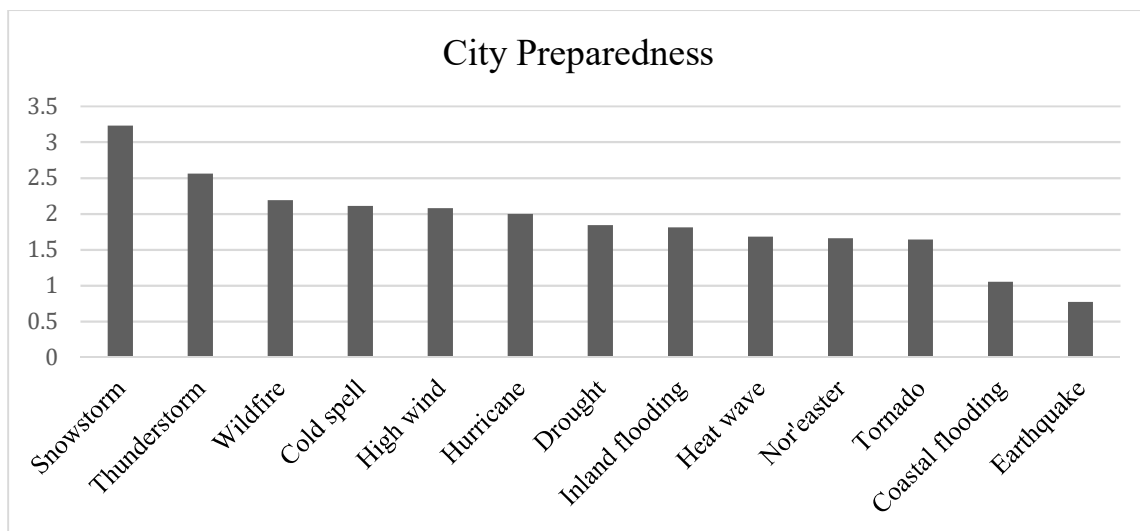

673  
674 **Figure 7.** Survey result's regarding the level of city's preparedness to impactful hazards potentially affecting  
675 NYC out of a maximum of 5 points.  
676

#### 677 4. Discussion

678 Based on the NOAA-NYT quali-quantitative assessment of multi-hazard climatic events, the responses of the  
679 survey as well as from the analysis carried out for a companion study (by Depietri and McPhearson, 2018),  
680 NYC can be described as at risk from multiple and overlapping hazards, both spatially and temporally. Multi-  
681 hazard risk is therefore a reality that is important to further understand and plan for in NYC. We also suggest  
682 other similar located coastal megacities would benefit from a multi-hazard perspective on planning and policy

683 for climate adaptation and resiliency. We focused on heat waves, inland and coastal flooding multi-hazard  
684 risks and assess how these are spatially distributed leading to overlapping risks. We find that the hazards  
685 considered mainly affect the coastal areas while the socio-economic vulnerability is concentrated in central  
686 areas of Brooklyn where the poorest segments of the population reside and in the Bronx. Parts of Manhattan  
687 are also highly vulnerable, likely due to the concentration of elderly and people living alone in these areas of  
688 the city or to the poverty that characterizes certain neighborhoods, such as Harlem. Coastal areas of the city  
689 facing the open sea as well as large areas of Manhattan and the Bronx were also the most at risk from the  
690 multiple hazards considered. We suggest that adaptation strategies should prioritize these areas. Further soft  
691 or hard infrastructures need to be adapted to potential inland flooding and heat waves for instance through  
692 enhanced infiltration and reduction of the urban heat island by improving the distribution of green  
693 infrastructures. No part of the city is totally devoid of potential impacts from these hazards and synergies and  
694 tradeoffs should be carefully evaluated. Coastal flooding also appears to be one of the hazards the city is least  
695 prepared to, followed by heat waves and inland flooding, amongst the hazards considered in this study. These  
696 results support current priorities in the city to invest resources to improve coastal areas, such as Jamaica Bay  
697 and its remaining wetlands.

698  
699 The quantitative analysis we conducted principally considered the social aspects of vulnerability and risk.  
700 We illustrate that parts of the city potentially affected to multiple hazards do not necessarily correspond to  
701 the areas with highest densities of vulnerable people live. A further development of this study could include  
702 indicators of infrastructural vulnerability especially in reference to inland and coastal flood risk. Some of the  
703 indicators that could be used to extend this analysis include: the conditions of exposed buildings; roads,  
704 railroads and the subway system; and other critical infrastructures that supply energy, support communication  
705 or treat wastewater.

706  
707 Multi-hazard risk indicator weights were derived from expert-input through a survey methodology where  
708 experts ranked indicators and sub-indicators. This survey approach allowed for the development of an  
709 assessment specific to the case of the city of New York. Higher multi-hazard risk in coastal zones is partially  
710 driven by weights derived from survey respondents and may depend on the recent awareness raised by  
711 disastrous impacts caused by Hurricane Sandy and generally because of the high infrastructural and social  
712 impacts these hazards have on the city. We initially calculated risk through all steps described but with equal  
713 weighting. The results still showed that the coastal areas of Brooklyn, Harlem and the Bronx were the most  
714 at risk to multiple hazards. This suggests that the methodology is robust and would not lead to significantly  
715 different results with a change of weights.

716  
717 The choice of the 311 calls to represent inland flooding allowed us to include an element of the disaster scape  
718 of NYC which, to our knowledge, has not been explored in previous studies. Despite the potential limitations  
719 of the approach, areas identified at high risk of inland flooding varied little with changes in the classification  
720 method. The methodology can potentially be expanded to accommodate other indicators, for instance to

721 produce hazard-specific vulnerability maps instead of a common assessment. By including a broader range  
722 of vulnerability indicators and by conducting hazard specific vulnerability assessments each step of the  
723 methodology would potentially be reinforced and provide additional insights.

724  
725 The quantitative aspects of this work also show the significance of each step of the methodology. Each map  
726 provides valuable information to detecting risk in the city beyond the final aggregated risk map. For instance,  
727 the maps of the components of vulnerability show that high exposure (or where most of the people are  
728 located) does not correspond to areas where people are the most vulnerable. Further, the final risk map, when  
729 compared with the combined hazards maps, shows that the main determinant factor of risk is the level of  
730 multi-hazard rather than the vulnerability of the population. The detailed spatial resolution of the risk  
731 assessment provides decision makers with the possibility to prioritize areas of intervention at high spatial  
732 resolution, down to the building and street level where most planning and development decisions actually  
733 occur. By considering the three hazards jointly, no inhabited area of the city is exempt from risk, while other  
734 areas show an accumulation of risk and thus locations that should be prioritized for adaptation and mitigation  
735 interventions.

736

## 737 **5. Conclusions**

738 This study provides a comprehensive assessment of the relevance of a multi-hazard approach in a coastal  
739 megacity and its application to three of the main hazards that affect New York City: heat waves, coastal  
740 flooding and inland flooding. The results of a NOAA NYT database search and the experts' responses to a  
741 questionnaire illustrate the relevance of considering risk in NYC in terms of multi-hazard risk. The  
742 quantitative analysis showed that risk to multiple hazards in NYC is mainly driven by the distribution of the  
743 hazards rather than by vulnerability. The concentration of people, the susceptibility and the lack of coping  
744 capacity play a secondary role in determining risk which is instead dominated by the magnitude and  
745 distribution of the hazards combined.

746

747 For the three hazards considered, we focus on a significant spatial overlap in where hazards and risk exist in  
748 the city. The results showed that the city is most at risk in the coast areas of midtown and downtown  
749 Manhattan, Harlem and the coastal areas of Brooklyn, especially those surrounding Jamaica bay. A  
750 predominant role is thus played by coastal flooding. The analysis of these results suggest that decision makers  
751 should prioritize strategies that protect the city from coastal flooding while considering at the same time that  
752 those areas are also affected by other hazards and should be jointly addressed. These considerations are  
753 supported by the responses from the survey that emphasize how the city is little prepared to cope with coastal  
754 flooding.

755

756 Further research should consider additional indicators of physical vulnerability and cascading effects  
757 provoked by climatological hazards and leading to failure of critical infrastructures dangerous for human  
758 health (e.g. power outages and exposure to toxic substances). We suggest that it is important for not only

759 NYC, but other coastal megacities to adopt a multi-hazard approach to understanding climate related risk and  
760 for designing and prioritizing action to maximize interventions and investments in ways that reduce risk and  
761 build resilience to multiple hazards.

762

763

764

765

766

## 767 **Acknowledgements**

768 We thank Jaskirat Randhawa for data visualization assistance, Bill Solecki and Erin Friedman for feedback  
769 and local experts for input on weightings. Research was supported by the Urban Resilience to Extreme  
770 Weather-Related Events Sustainability Research Network (URExSRN; NSF grant no. SES 1444755) and  
771 through the 2015-2016 BiodivERsA COFUND call for research proposals, with the as national funders: the  
772 Swedish Research Council for Environment, Agricultural Sciences, and Spatial Planning; Swedish  
773 Environmental Protection Agency; German aeronotics and space research centre; National Science Centre  
774 (Poland); the Research Council of Norway; and Spanish Ministry of Economy and Competitiveness. Yaella  
775 Depietri was partially supported by the Zeff fellowship at the Technion, Israel Institute of Technology.

776

777

778

779

## 780 **References**

781

782 Abramson, D.M., Redlener, I., 2012. Hurricane Sandy: lessons learned, again. *Disaster*  
783 *Med. Public Health Prep.* 6, 328–329.

784 Aerts, J.C.J.H., Botzen, W.J.W., 2012. Managing exposure to flooding in New York City.  
785 *Nat. Clim. Change* 2, 377. <https://doi.org/10.1038/nclimate1487>

786 Aerts, J.C.J.H., Lin, N., Botzen, W., Emanuel, K., de Moel, H., 2013. Low-Probability  
787 Flood Risk Modeling for New York City: Low-Probability Flood Risk Modeling  
788 for New York City. *Risk Anal.* 33, 772–788. <https://doi.org/10.1111/risa.12008>

789 Agel, L., Barlow, M., Qian, J.-H., Colby, F., Douglas, E., Eichler, T., 2015. Climatology  
790 of Daily Precipitation and Extreme Precipitation Events in the Northeast United  
791 States. *J. Hydrometeorol.* 16, 2537–2557. [https://doi.org/10.1175/JHM-D-14-](https://doi.org/10.1175/JHM-D-14-0147.1)  
792 0147.1

793 Anderson, B., Bell, M., 2011. Heat Waves and Mortality in New York, NY.

794 *Epidemiology* 22, S20. <https://doi.org/10.1097/01.ede.0000391719.31370.34>

795 Anderson, G.B., Bell, M.L., 2012. Lights out: Impact of the August 2003 power outage  
796 on mortality in New York, NY. *Epidemiol. Camb. Mass* 23, 189–193.

797 <https://doi.org/10.1097/EDE.0b013e318245c61c>

798 Aydi, A., Zairi, M., Dhia, H.B., 2013. Minimization of environmental risk of landfill site  
799 using fuzzy logic, analytical hierarchy process, and weighted linear combination

800 methodology in a geographic information system environment. *Environ. Earth*  
801 *Sci.* 68, 1375–1389. <https://doi.org/10.1007/s12665-012-1836-3>

802 Bankoff, G., Frerks, G., Hilhorst, T. (Eds.), 2004. *Mapping vulnerability: disasters,*  
803 *development, and people.* Earthscan Publications, London ; Sterling, VA.

804 Bernal, G.A., Salgado-Gálvez, M.A., Zuloaga, D., Tristancho, J., González, D., Cardona,  
805 O.-D., 2017. Integration of Probabilistic and Multi-Hazard Risk Assessment  
806 Within Urban Development Planning and Emergency Preparedness and  
807 Response: Application to Manizales, Colombia. *Int. J. Disaster Risk Sci.* 8, 270–  
808 283. <https://doi.org/10.1007/s13753-017-0135-8>

809 Birkmann, J. (Ed.), 2006. *Measuring vulnerability to natural hazards: towards disaster*  
810 *resilient societies.* United Nations University, Tokyo ; New York.

811 Birkmann, J., Cardona, O.D., Carreño, M.L., Barbat, A.H., Pelling, M., Schneiderbauer,  
812 S., Kienberger, S., Keiler, M., Alexander, D., Zeil, P., Welle, T., 2013. Framing  
813 vulnerability, risk and societal responses: the MOVE framework. *Nat. Hazards*  
814 67, 193–211. <https://doi.org/10.1007/s11069-013-0558-5>

815 Blake, E.S., Kimberlain, T.B., Berg, R.J., Cangialosi, J.P., Beven, J.L., 2013. *Tropical*  
816 *Cyclone Report Hurricane Sandy 22 – 29 October 2012.* National Hurricane  
817 Center.

818 Blake, E.S., Lansea, C.W., Gibney, E.J., 2011. *The deadliest, costliest, and most intense*  
819 *United States Tropical Cyclones from 1851 to 2100 (and other frequently*  
820 *requested Hurricane facts).* National Weather Service, National Hurricane Center,  
821 Miami, Florida.

822 Bogardi, J.J., Birkmann, J., 2004. Vulnerability assessment: the first step towards  
823 sustainable risk reduction, in: Malzahn, D., Plapp, T. (Eds.), *Disasters and Society*  
824 *- from Hazard Assessment to Risk Reduction.* Logos Verlag, Berlin, pp. 75–82.

825 Cardona, O.D., 2004. The Need for Rethinking the Concepts of Vulnerability and Risk  
826 from a Holistic Perspective: A Necessary Review and Criticism for Effective Risk  
827 Management, in: Bankoff, G., Frerks, G., Hilhorst, T. (Eds.), *Mapping*  
828 *Vulnerability: Disasters, Development, and People.* Earthscan Publications,  
829 London ; Sterling, VA.

830 Catalano, A.J., Broccoli, A.J., 2017. Synoptic Characteristics of Surge-Producing  
831 Extratropical Cyclones along the Northeast Coast of the United States. *J. Appl.*  
832 *Meteorol. Climatol.* 57, 171–184. <https://doi.org/10.1175/JAMC-D-17-0123.1>

833 CDCP, 2013. *Heat Illness and Death - New York City, 2000-2011 (No. Vol. 62, N. 31),*  
834 *Morbidity and Mortality Weekly Report.* U.S. Department of Health and Human  
835 Services, Centers for Disease Control and Prevention.

836 Clarke, J.F., 1972. Some effects of the urban structure on heat mortality. *Environ. Res.* 5,  
837 93–104. [https://doi.org/10.1016/0013-9351\(72\)90023-0](https://doi.org/10.1016/0013-9351(72)90023-0)

838 Colle, B.A., Buonaiuto, F., Bowman, M.J., Wilson, R.E., Flood, R., Hunter, R., Mintz,  
839 A., Hill, D., 2008. New York City’s Vulnerability to Coastal Flooding: Storm  
840 Surge Modeling of Past Cyclones. *Bull. Am. Meteorol. Soc.* 89, 829–841.  
841 <https://doi.org/10.1175/2007BAMS2401.1>

842 Collins, T.W., 2010. Marginalization, Facilitation, and the Production of Unequal Risk:  
843 The 2006 Paso del Norte Floods. *Antipode* 42, 258–288.  
844 <https://doi.org/10.1111/j.1467-8330.2009.00755.x>

845 Depietri, Y., McPhearson, T., 2018. Changing urban risk: 140 years of climatic hazards  
846 in New York City. *Clim. Change* 1–14. [https://doi.org/10.1007/s10584-018-2194-](https://doi.org/10.1007/s10584-018-2194-2)  
847 2

848 Depietri, Y., Renaud, F.G., Kallis, G., 2011. Heat waves and floods in urban areas: a  
849 policy-oriented review of ecosystem services. *Sustain. Sci.* 7, 95–107.  
850 <https://doi.org/10.1007/s11625-011-0142-4>

851 Dickson, E., Baker, J.L., Hoornweg, D., Asmita, T., 2012. *Urban Risk Assessments: An*  
852 *Approach for Understanding Disaster and Climate Risk in Cities.* The World  
853 Bank.

854 D’Ippoliti, D., Michelozzi, P., Marino, C., de’Donato, F., Menne, B., Katsouyanni, K.,  
855 Kirchmayer, U., Analitis, A., Medina-Ramón, M., Paldy, A., Atkinson, R.,  
856 Kovats, S., Bisanti, L., Schneider, A., Lefranc, A., Iñiguez, C., Perucci, C.A.,  
857 2010. The impact of heat waves on mortality in 9 European cities: results from the  
858 EuroHEAT project. *Environ. Health* 9, 37. [https://doi.org/10.1186/1476-069X-9-](https://doi.org/10.1186/1476-069X-9-37)  
859 37

860 Ellis, F.P., Nelson, F., Pincus, L., 1975. Mortality during heat waves in New York City  
861 July, 1972 and August and September, 1973. *Environ. Res.* 10, 1–13.  
862 [https://doi.org/10.1016/0013-9351\(75\)90069-9](https://doi.org/10.1016/0013-9351(75)90069-9)

863 Forzieri, G., Feyen, L., Russo, S., Voudoukas, M., Alfieri, L., Outten, S., Migliavacca,  
864 M., Bianchi, A., Rojas, R., Cid, A., 2016. Multi-hazard assessment in Europe  
865 under climate change. *Clim. Change* 137, 105–119.  
866 <https://doi.org/10.1007/s10584-016-1661-x>

867 Garner, A.J., Mann, M.E., Emanuel, K.A., Kopp, R.E., Lin, N., Alley, R.B., Horton, B.P.,  
868 DeConto, R.M., Donnelly, J.P., Pollard, D., 2017. Impact of climate change on  
869 New York City’s coastal flood hazard: Increasing flood heights from the  
870 preindustrial to 2300 CE. *Proc. Natl. Acad. Sci.* 201703568.  
871 <https://doi.org/10.1073/pnas.1703568114>

872 Gedzelman, S.D., Austin, S., Cermak, R., Stefano, N., Partridge, S., Quesenberry, S.,  
873 Robinson, D.A., 2003. Mesoscale aspects of the Urban Heat Island around New  
874 York City. *Theor. Appl. Climatol.* 75, 29–42. [https://doi.org/10.1007/s00704-002-](https://doi.org/10.1007/s00704-002-0724-2)  
875 0724-2

876 Goldman, L., Finkelstein, R., Schafer, P., Pugh, T., 2014. *Resilient Communities:*  
877 *Empowering Older Adults in Disasters and Daily Life.* The New York Academy  
878 of Medicine.

879 Gornitz, V., Couch, S., Hartig, E.K., 2001. Impacts of sea level rise in the New York City  
880 metropolitan area. *Glob. Planet. Change* 32, 61–88.  
881 [https://doi.org/10.1016/S0921-8181\(01\)00150-3](https://doi.org/10.1016/S0921-8181(01)00150-3)

882 Graham, S., 2010. *Disrupted cities: When infrastructure fails.* Routledge.

883 Greiving, S., 2006. Multi-risk assessment of Europe’s regions, in: Birkmann, J. (Ed.),  
884 *Measuring Vulnerability to Natural Hazards: Towards Disaster Resilient*  
885 *Societies.* pp. 210–26.

886 Greiving, S., Fleischhauer, M., Lückenkötter, J., 2006. A Methodology for an integrated  
887 risk assessment of spatially relevant hazards. *J. Environ. Plan. Manag.* 49, 1–19.  
888 <https://doi.org/10.1080/09640560500372800>

889 Horton, R., Bader, D., Kushnir, Y., Little, C., Blake, R., Rosenzweig, C., 2015a. *New*  
890 *York City Panel on Climate Change 2015 Report.* Chapter 1: Climate

891 Observations and Projections: NPCC 2015 Report Chapter 1. *Ann. N. Y. Acad. Sci.* 1336, 18–35. <https://doi.org/10.1111/nyas.12586>

892

893 Horton, R., Little, C., Gornitz, V., Bader, D., Oppenheimer, M., 2015b. New York City

894 Panel on Climate Change 2015 Report. Chapter 2: Sea Level Rise and Coastal

895 Storms: NPCC 2015 Report Chapter 2. *Ann. N. Y. Acad. Sci.* 1336, 36–44.

896 <https://doi.org/10.1111/nyas.12593>

897 Huang, G., Zhou, W., Cadenasso, M.L., 2011. Is everyone hot in the city? Spatial pattern

898 of land surface temperatures, land cover and neighborhood socioeconomic

899 characteristics in Baltimore, MD. *J. Environ. Manage.* 92, 1753–1759.

900 <https://doi.org/10.1016/j.jenvman.2011.02.006>

901 Janke, J.R., 2010. Multicriteria GIS modeling of wind and solar farms in Colorado.

902 *Renew. Energy* 35, 2228–2234. <https://doi.org/10.1016/j.renene.2010.03.014>

903 Johnson, K., Depietri, Y., Breil, M., 2016. Multi-hazard risk assessment of two Hong

904 Kong districts. *Int. J. Disaster Risk Reduct.* 19, 311–323.

905 <https://doi.org/10.1016/j.ijdr.2016.08.023>

906 Kappes, M.S., Keiler, M., von Elverfeldt, K., Glade, T., 2012a. Challenges of analyzing

907 multi-hazard risk: a review. *Nat. Hazards* 64, 1925–1958.

908 <https://doi.org/10.1007/s11069-012-0294-2>

909 Kappes, M.S., Papathoma-Köhle, M., Keiler, M., 2012b. Assessing physical vulnerability

910 for multi-hazards using an indicator-based methodology. *Appl. Geogr.* 32, 577–

911 590. <https://doi.org/10.1016/j.apgeog.2011.07.002>

912 Kemp, A.C., Horton, B.P., 2013. Contribution of relative sea-level rise to historical

913 hurricane flooding in New York City. *J. Quat. Sci.* 28, 537–541.

914 <https://doi.org/10.1002/jqs.2653>

915 Kinney, P.L., Matte, T., Knowlton, K., Madrigano, J., Petkova, E., Weinberger, K.,

916 Quinn, A., Arend, M., Pullen, J., 2015. New York City Panel on Climate Change

917 2015 Report Chapter 5: Public Health Impacts and Resiliency: NPCC 2015 Report

918 Chapter 5. *Ann. N. Y. Acad. Sci.* 1336, 67–88. <https://doi.org/10.1111/nyas.12588>

919 Klein Rosenthal, J., Kinney, P.L., Metzger, K.B., 2014. Intra-urban vulnerability to heat-

920 related mortality in New York City, 1997–2006. *Health Place* 30, 45–60.

921 <https://doi.org/10.1016/j.healthplace.2014.07.014>

922 Knowlton, K., Lynn, B., Goldberg, R.A., Rosenzweig, C., Klein Rosenthal, J., Kinney,

923 P.L., 2007. Projecting heat-related mortality impacts under a changing climate in

924 the New York City region. *Am. J. Public Health* 97, 2028–34.

925 Knutson, T.R., Sirutis, J.J., Zhao, M., Tuleya, R.E., Bender, M., Vecchi, G.A., Villarini,

926 G., Chavas, D., 2015. Global Projections of Intense Tropical Cyclone Activity for

927 the Late Twenty-First Century from Dynamical Downscaling of CMIP5/RCP4.5

928 Scenarios. *J. Clim.* 28, 7203–7224. <https://doi.org/10.1175/JCLI-D-15-0129.1>

929 Kopp, R.E., Horton, R.M., Little, C.M., Mitrovica, J.X., Oppenheimer, M., Rasmussen,

930 D.J., Strauss, B.H., Tebaldi, C., 2014. Probabilistic 21st and 22nd century sea-

931 level projections at a global network of tide-gauge sites. *Earth's Future* 2, 383–

932 406. <https://doi.org/10.1002/2014EF000239>

933 Lane, K., Charles-Guzman, K., Wheeler, K., Abid, Z., Graber, N., Matte, T., 2013.

934 Health Effects of Coastal Storms and Flooding in Urban Areas: A Review and

935 Vulnerability Assessment [WWW Document]. *J. Environ. Public Health.*

936 <https://doi.org/10.1155/2013/913064>



937 Lin, N., Emanuel, K., Oppenheimer, M., Vanmarcke, E., 2012. Physically based  
938 assessment of hurricane surge threat under climate change. *Nat. Clim. Change* 2,  
939 462–467. <https://doi.org/10.1038/nclimate1389>

940 Lin, N., Emanuel, K.A., Smith, J.A., Vanmarcke, E., 2010. Risk assessment of hurricane  
941 storm surge for New York City. *J. Geophys. Res.* 115.  
942 <https://doi.org/10.1029/2009JD013630>

943 Lin, N., Kopp, R.E., Horton, B.P., Donnelly, J.P., 2016. Hurricane Sandy’s flood  
944 frequency increasing from year 1800 to 2100. *Proc. Natl. Acad. Sci.* 113, 12071–  
945 12075. <https://doi.org/10.1073/pnas.1604386113>

946 Liu, Z., Nadim, F., Garcia-Aristizabal, A., Mignan, A., Fleming, K., Luna, B.Q., 2015. A  
947 three-level framework for multi-risk assessment. *Georisk Assess. Manag. Risk*  
948 *Eng. Syst. Geohazards* 9, 59–74. <https://doi.org/10.1080/17499518.2015.1041989>

949 Llyod, E., Licata, A., n.d. One New York City: One Water. Sustainable water  
950 managemnet for New York City’s people and environment.

951 Lozoya, J.P., Sardá, R., Jiménez, J.A., 2011. A methodological framework for multi-  
952 hazard risk assessment in beaches. *Environ. Sci. Policy* 14, 685–696.  
953 <https://doi.org/10.1016/j.envsci.2011.05.002>

954 Luber, G., McGeehin, M., 2008. Climate Change and Extreme Heat Events. *Am. J. Prev.*  
955 *Med.* 35, 429–435. <https://doi.org/10.1016/j.amepre.2008.08.021>

956 MA, 2005. Ecosystems and human well-being: current state and trends: findings of the  
957 Condition and Trends Working Group of the Millennium Ecosystem Assessment,  
958 The millennium ecosystem assessment series. Island Press, Washington, DC.

959 Madrigano, J., Ito, K., Johnson, S., Kinney, P.L., Matte, T., 2015. A Case-Only Study of  
960 Vulnerability to Heat Wave–Related Mortality in New York City (2000–2011).  
961 *Environ. Health Perspect.* <https://doi.org/10.1289/ehp.1408178>

962 Mennis, J., Hultgren, T., 2006. Intelligent Dasymmetric Mapping and Its Application to  
963 Areal Interpolation. *Cartogr. Geogr. Inf. Sci.* 33, 179–194.  
964 <https://doi.org/10.1559/152304006779077309>

965 Michael, E.A., Samanta, S., 2016. Landslide vulnerability mapping (LVM) using  
966 weighted linear combination (WLC) model through remote sensing and GIS  
967 techniques. *Model. Earth Syst. Environ.* 2, 88. <https://doi.org/10.1007/s40808-016-0141-7>

968

969 Nicholls, R.J., Small, C., 2002. Improved estimates of coastal population and exposure to  
970 hazards released. *Eos Trans. Am. Geophys. Union* 83, 301.  
971 <https://doi.org/10.1029/2002EO000216>

972 NYC, 2014. Heat-related Deaths in New York City, 2013 (No. 47), Epi Data Brief. New  
973 York City Department of Health and Mental Hygiene.

974 NYC, 2013. A stronger more resilient New York. The City of New York.

975 NYC, 2010. NYC green infrastructure plan: A sustainable strategy for clean waterways.  
976 City of New York, New York, USA.

977 NYC, 2006. Deaths Associated with Heat Waves in 2006 (Special Report), NYC Vital  
978 Signs Investigation Report. New York City Department of Health and Mental  
979 Hygiene.

980 NYCEM, 2014. NYC’s risk landscape: a guide to hazard mitigation. New York City  
981 Emergency Management, Department of City Planning and Mayor Office of  
982 Recovery and Resiliency.

983 Oliver-Smith, A., 2004. Theorizing vulnerability in a globalized world: a political  
984 ecological perspective, in: Bankoff, G., Frerks, G., Hilhorst, D. (Eds.), Mapping  
985 Vulnerability: Disasters, Development and People. Earthscan, London, pp. 10–24.

986 Oudin Åström, D., Bertil, F., Joacim, R., 2011. Heat wave impact on morbidity and  
987 mortality in the elderly population: A review of recent studies. *Maturitas* 69, 99–  
988 105. <https://doi.org/10.1016/j.maturitas.2011.03.008>

989 Pelling, M., 2003. *The Vulnerability of Cities: Natural Disasters and Social Resilience*.  
990 Earthscan.

991 Pelling, M., Blackburn, S. (Eds.), 2013. *Megacities and the coast: risk, resilience, and  
992 transformation*. Routledge/Taylor & Francis Group, London ; New York.

993 Petkova, E.P., Gasparrini, A., Kinney, P.L., 2014. Heat and Mortality in New York City  
994 Since the Beginning of the 20th Century: *Epidemiology* 25, 554–560.  
995 <https://doi.org/10.1097/EDE.0000000000000123>

996 Philippi, C., 2016. *Megacities Pushing the Boundaries of our Industry*. Risk trends and  
997 insurance challenges. Allianz Global Corporate & Specialty.

998 Reed, A.J., Mann, M.E., Emanuel, K.A., Lin, N., Horton, B.P., Kemp, A.C., Donnelly,  
999 J.P., 2015. Increased threat of tropical cyclones and coastal flooding to New York  
1000 City during the anthropogenic era. *Proc. Natl. Acad. Sci.* 201513127.  
1001 <https://doi.org/10.1073/pnas.1513127112>

1002 Rosenzweig, C., Gaffin, S., Parshall, L. (Eds.), 2006. *Green Roofs in the New York  
1003 Metropolitan Region*. Research Report. Columbia University Centre for Climate  
1004 Systems Reserach and NASA Goddard Institute for Space Studies, New York.

1005 Rosenzweig, C., Solecki, W., 2015. New York City Panel on Climate Change 2015  
1006 Report Introduction: NPCC 2015 Report Introduction. *Ann. N. Y. Acad. Sci.*  
1007 1336, 3–5. <https://doi.org/10.1111/nyas.12625>

1008 Rosenzweig, C., Solecki, W.D., Blake, R., Bowman, M., Faris, C., Gornitz, V., Horton,  
1009 R., Jacob, K., LeBlanc, A., Leichenko, R., Linkin, M., Major, D., O’Grady, M.,  
1010 Patrick, L., Sussman, E., Yohe, G., Zimmerman, R., 2011. Developing coastal  
1011 adaptation to climate change in the New York City infrastructure-shed: process,  
1012 approach, tools, and strategies. *Clim. Change* 106, 93–127.  
1013 <https://doi.org/10.1007/s10584-010-0002-8>

1014 Saisana, M., Tarantola, S., 2002. State-of-the-art report on current methodologies and  
1015 practices for composite indicator development. Citeseer.

1016 Schuman, S.H., 1972. Patterns of urban heat-wave deaths and implications for  
1017 prevention: Data from New York and St. Louis during July, 1966. *Environ. Res.*  
1018 5, 59–75. [https://doi.org/10.1016/0013-9351\(72\)90020-5](https://doi.org/10.1016/0013-9351(72)90020-5)

1019 Smith, M.J. de, Goodchild, M.F., Longley, P.A., 2007. *Geospatial Analysis: A  
1020 Comprehensive Guide to Principles, Techniques and Software Tools*, 2nd Revised  
1021 edition. ed. Matador, Leicester.

1022 Smith, J.A., Villarini, G., Baeck, M.L., 2010. Mixture Distributions and the  
1023 Hydroclimatology of Extreme Rainfall and Flooding in the Eastern United States.  
1024 *J. Hydrometeorol.* 12, 294–309. <https://doi.org/10.1175/2010JHM1242.1>

1025 Talke, S.A., Orton, P., Jay, D.A., 2014. Increasing storm tides in New York Harbor,  
1026 1844–2013. *Geophys. Res. Lett.* 41, 3149–3155.  
1027 <https://doi.org/10.1002/2014GL059574>

1028 Towey, K.L., Booth, J.F., Frei, A., Sinclair, M.R., 2018. Track and Circulation Analysis  
1029 of Tropical and Extratropical Cyclones that Cause Strong Precipitation and  
1030 Streamflow Events in the New York City Watershed. *J. Hydrometeorol.* 19,  
1031 1027–1042. <https://doi.org/10.1175/JHM-D-17-0199.1>

1032 Turner, B.L., Kasperson, R.E., Matson, P.A., McCarthy, J.J., Corell, R.W., Christensen,  
1033 L., Eckley, N., Kasperson, J.X., Luers, A., Martello, M.L., Polsky, C., Pulsipher,  
1034 A., Schiller, A., 2003. A framework for vulnerability analysis in sustainability  
1035 science. *Proc. Natl. Acad. Sci.* 100, 8074–8079.  
1036 <https://doi.org/10.1073/pnas.1231335100>

1037 UN, 2002. Johannesburg Declaration on Sustainable Development. Plan of  
1038 Implementation of the World Summit on Sustainable Development. United  
1039 Nations; World Summit on Sustainable Development (UN).

1040 UNDESA, 2016. The World’s Cities in 2016: Data Booklet. United Nations, Department  
1041 of Economic and Social Affairs, Population Division, New York, NY.

1042 UNEP, 1992. Agenda 21. Tech. rep., United Nations Environment Programme.

1043 UNISDR, 2015. Global Assessment Report on Disaster Risk Reduction. Making  
1044 Development Sustainable: The future of Disaster Risk Management. United  
1045 Nations Office for Disaster Risk Reduction (UNISDR), Geneva, Switzerland.

1046 UNISDR, 2005. Hyogo Declaration.

1047 van Westen, C.J., Montoya, L., Boerboom, L., Badilla Coto, E., 2002. Multi-hazard risk  
1048 assessment using GIS in urban areas: a case study for the city of Turrialba, Costa  
1049 Rica. Presented at the The Regional Workshop on Best Practices in Disaster  
1050 Mitigation: lessons learned from the Asian urban disaster mitigation program and  
1051 other initiatives, Bali Indonesia, pp. 120–136.

1052 Welle, T., Birkmann, J., 2015. The World Risk Index – An Approach to Assess Risk and  
1053 Vulnerability on a Global Scale. *J. Extreme Events* 02, 1550003.  
1054 <https://doi.org/10.1142/S2345737615500037>

1055 Wipulanusat, W., Nakrod, S., Prabnarong, P., 2011. Multi-hazard Risk Assessment Using  
1056 GIS and RS Applications: A Case Study of Pak Phanang Basin. *Walailak J. Sci.*  
1057 *Technol. WJST* 6, 109–125. <https://doi.org/10.2004/wjst.v6i1.76>

1058 Wisner, B., Blaikie, P., Cannon, T., Davis, I., 2014. At risk: Natural Hazards, People’s  
1059 Vulnerability and Disasters. Routledge.

1060 Zhou, S., Chen, G., Fang, L., Nie, Y., 2016. GIS-Based Integration of Subjective and  
1061 Objective Weighting Methods for Regional Landslides Susceptibility Mapping.  
1062 *Sustainability* 8, 334. <https://doi.org/10.3390/su8040334>  
1063
